# Supplementary material
Source: publisher figshare collection journal article supplement (https://acs.figshare.com/ndownloader/files/5774226)
Supplement: Supplementary file 1 [file 5774226]

Journal of  
**Medicinal Chemistry**

J. Med. Chem., 1998, 41(21), 4062-4079, DOI: [10.1021/jm980300f](https://doi.org/10.1021/jm980300f)

**Terms & Conditions**

Electronic Supporting Information files are available without a subscription to ACS Web Editions. The American Chemical Society holds a copyright ownership interest in any copyrightable Supporting Information. Files available from the ACS website may be downloaded for personal use only. Users are not otherwise permitted to reproduce, republish, redistribute, or sell any Supporting Information from the ACS website, either in whole or in part, in either machine-readable form or any other form without permission from the American Chemical Society. For permission to reproduce, republish and redistribute this material, requesters must process their own requests via the RightsLink permission system. Information about how to use the RightsLink permission system can be found at <http://pubs.acs.org/page/copyright/permissions.html>

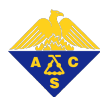

**ACS Publications**  
MOST TRUSTED. MOST CITED. MOST READ.

Copyright © 1998 American Chemical Society

X-ray crystallographic data of **34a**.

(1) Unit cell parameters and standard errors

$$a = 8.14 (1) \text{ \AA}, b = 19.952 (9) \text{ \AA}, c = 11.836 (7) \text{ \AA}, \beta = 106.57 (7)^\circ, V = 1842 (2) \text{ \AA}^3$$

(2) The formula, formula weight, and number of formula units in the unit cell

$$2\text{C}_9\text{H}_8\text{N}_2\text{O} \cdot \text{C}_6\text{H}_6\text{O}_2, \text{ Mw} = 402.45, Z = 4$$

(3) Measured and calculated densities

$$D_{\text{calc}} = 1.45 \text{ g/cm}^3, D_{\text{meas}}: \text{ not measured}$$

(4) Space group

*P*21/a

(5) Data

$$\lambda = 1.54178 \text{ \AA}, \text{ No. of observed} = 1662, \text{ No. of measured} = 3201$$

(6) Methods

Collection of intensity data: Diffractometer; Rigaku AFC5R, Scan type; w-2 $\theta$ , Scan rate; 8.0°/min

Structure solution: Direct method (SHELX 86)

Refinement: Full-matrix least-square

(7) Final R value

$$R = 0.057, R_w = 0.059$$

(8) Final difference Fourier map

$$\text{maximum peak: } 0.25 \text{ e/\AA}^3, \text{ minimum peak: } -0.28 \text{ e/\AA}^3$$

(9) Structure

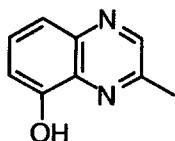

## (10) Tables

## (a) Final atomic positional parameters and B (eq) or B (iso)

| atom   | x         | y         | z         | B(eq) or B(iso) |
|--------|-----------|-----------|-----------|-----------------|
| O(4s)  | 0.7062(5) | 0.4441(2) | 0.3522(4) | 4.5(2)          |
| O(12b) | 0.2497(5) | 0.2045(2) | 0.3985(3) | 4.3(2)          |
| O(12a) | 0.4813(6) | 0.3506(2) | 0.9182(4) | 4.7(2)          |
| N(1a)  | 0.5489(6) | 0.2364(2) | 0.7997(4) | 3.5(2)          |
| N(1b)  | 0.3161(6) | 0.1579(2) | 0.2052(4) | 3.5(2)          |
| N(4a)  | 0.6474(6) | 0.2552(2) | 0.5921(4) | 3.8(2)          |
| N(4b)  | 0.4095(6) | 0.2470(2) | 0.0489(4) | 3.8(2)          |
| C(1s)  | 0.8394(9) | 0.5221(3) | 0.5001(5) | 3.4(3)          |
| C(2b)  | 0.3583(8) | 0.1362(3) | 0.1112(5) | 3.9(3)          |
| C(2a)  | 0.5824(7) | 0.1856(3) | 0.7392(5) | 3.6(3)          |
| C(2s)  | 0.8541(9) | 0.4708(3) | 0.4247(5) | 3.4(3)          |
| C(3a)  | 0.6329(8) | 0.1964(3) | 0.6343(5) | 4.1(3)          |
| C(3b)  | 0.4045(8) | 0.1818(3) | 0.0337(5) | 4.3(3)          |
| C(3s)  | 1.0149(9) | 0.4490(3) | 0.4252(5) | 3.7(3)          |
| C(5b)  | 0.3661(7) | 0.2710(3) | 0.1450(5) | 3.1(2)          |
| C(5a)  | 0.6109(7) | 0.3098(3) | 0.6524(4) | 3.3(3)          |
| C(6b)  | 0.3686(9) | 0.3399(3) | 0.1662(6) | 4.2(3)          |
| C(6a)  | 0.6206(8) | 0.3746(3) | 0.6103(5) | 4.0(3)          |
| C(7b)  | 0.3285(8) | 0.3628(3) | 0.2635(6) | 4.4(3)          |
| C(7a)  | 0.5841(8) | 0.4277(3) | 0.6695(5) | 4.1(3)          |
| C(8b)  | 0.2872(8) | 0.3181(3) | 0.3437(5) | 3.8(3)          |
| C(8a)  | 0.5366(8) | 0.4189(3) | 0.7740(5) | 3.9(3)          |
| C(9b)  | 0.2840(7) | 0.2507(3) | 0.3255(5) | 3.4(3)          |
| C(9a)  | 0.5275(8) | 0.3562(3) | 0.8173(5) | 3.6(3)          |
| C(10b) | 0.3223(7) | 0.2250(3) | 0.2236(4) | 2.9(2)          |
| C(10a) | 0.5631(7) | 0.2994(3) | 0.7570(4) | 3.2(3)          |

|        |          |           |           |        |
|--------|----------|-----------|-----------|--------|
| C(11b) | 0.355(2) | 0.0626(4) | 0.088(1)  | 7.1(5) |
| C(11a) | 0.570(1) | 0.1151(4) | 0.7806(8) | 4.8(4) |
| H(1a)  | 0.662(6) | 0.154(2)  | 0.589(4)  | 4(1)   |
| H(1b)  | 0.447(7) | 0.160(3)  | -0.037(5) | 7(2)   |
| H(1s)  | 0.714(7) | 0.532(3)  | 0.503(4)  | 6(2)   |
| H(2b)  | 0.400(6) | 0.369(2)  | 0.115(4)  | 4(1)   |
| H(2a)  | 0.652(7) | 0.384(3)  | 0.540(4)  | 5(2)   |
| H(2s)  | 1.029(6) | 0.412(2)  | 0.373(4)  | 4(1)   |
| H(3a)  | 0.588(6) | 0.480(2)  | 0.639(4)  | 5(1)   |
| H(3b)  | 0.334(6) | 0.415(3)  | 0.278(4)  | 5(1)   |
| H(3s)  | 0.718(7) | 0.404(3)  | 0.319(5)  | 5(2)   |
| H(4b)  | 0.264(6) | 0.337(2)  | 0.415(4)  | 3(1)   |
| H(4a)  | 0.501(6) | 0.457(2)  | 0.817(4)  | 4(1)   |
| H(5b)  | 0.25(1)  | 0.040(4)  | 0.088(7)  | 13(4)  |
| H(5a)  | 0.464(8) | 0.106(3)  | 0.776(6)  | 7(2)   |
| H(6b)  | 0.36(1)  | 0.051(4)  | 0.027(6)  | 9(3)   |
| H(6a)  | 0.61(1)  | 0.079(4)  | 0.735(6)  | 12(3)  |
| H(7b)  | 0.43(1)  | 0.039(4)  | 0.142(7)  | 12(3)  |
| H(7a)  | 0.647(8) | 0.107(3)  | 0.851(6)  | 8(2)   |
| H(8b)  | 0.173(7) | 0.220(3)  | 0.447(5)  | 8(2)   |
| H(8a)  | 0.47(1)  | 0.311(3)  | 0.944(6)  | 10(2)  |

## (b) Atomic thermal parameters

| atom   | U11      | U22      | U33      | U12       | U13      | U23       |
|--------|----------|----------|----------|-----------|----------|-----------|
| O(4s)  | 0.054(3) | 0.041(3) | 0.069(3) | 0.001(2)  | 0.005(2) | 0.014(2)  |
| C(1s)  | 0.044(5) | 0.039(3) | 0.050(4) | 0.005(3)  | 0.018(3) | -0.003(3) |
| C(2s)  | 0.055(5) | 0.029(3) | 0.043(3) | -0.003(3) | 0.010(3) | 0.000(3)  |
| C(3s)  | 0.061(5) | 0.035(3) | 0.045(4) | 0.003(3)  | 0.019(3) | -0.008(3) |
| O(12b) | 0.083(3) | 0.046(2) | 0.047(2) | -0.004(2) | 0.039(2) | 0.002(2)  |

|        |          |          |          |           |          |           |
|--------|----------|----------|----------|-----------|----------|-----------|
| N(1b)  | 0.054(4) | 0.038(3) | 0.041(3) | 0.006(2)  | 0.013(3) | 0.000(2)  |
| N(4b)  | 0.059(4) | 0.047(3) | 0.043(3) | 0.003(3)  | 0.020(3) | 0.004(3)  |
| C(2b)  | 0.062(5) | 0.043(4) | 0.043(4) | 0.005(3)  | 0.012(3) | -0.003(3) |
| C(3b)  | 0.068(5) | 0.055(4) | 0.043(4) | 0.009(4)  | 0.020(4) | -0.001(3) |
| C(5b)  | 0.038(4) | 0.041(3) | 0.040(3) | 0.003(3)  | 0.012(3) | 0.001(3)  |
| C(6b)  | 0.069(5) | 0.037(4) | 0.061(4) | 0.000(3)  | 0.034(4) | 0.005(3)  |
| C(7b)  | 0.068(5) | 0.035(4) | 0.071(5) | -0.006(3) | 0.031(4) | -0.007(3) |
| C(8b)  | 0.056(5) | 0.046(4) | 0.049(4) | 0.000(3)  | 0.024(3) | -0.010(3) |
| C(9b)  | 0.044(4) | 0.043(4) | 0.043(4) | 0.002(3)  | 0.017(3) | 0.000(3)  |
| C(10b) | 0.036(4) | 0.033(3) | 0.041(3) | 0.001(3)  | 0.012(3) | 0.001(3)  |
| C(11b) | 0.16(1)  | 0.041(5) | 0.069(6) | 0.009(6)  | 0.038(7) | -0.009(5) |
| O(12a) | 0.089(4) | 0.047(3) | 0.056(3) | 0.001(3)  | 0.042(3) | -0.002(2) |
| N(1a)  | 0.052(4) | 0.041(3) | 0.041(3) | 0.001(2)  | 0.016(3) | 0.001(2)  |
| N(4a)  | 0.064(4) | 0.045(3) | 0.038(3) | -0.001(3) | 0.020(3) | -0.005(2) |
| C(2a)  | 0.054(4) | 0.038(3) | 0.048(4) | 0.001(3)  | 0.016(3) | 0.000(3)  |
| C(3a)  | 0.071(5) | 0.042(4) | 0.047(4) | 0.001(4)  | 0.024(4) | -0.008(3) |
| C(5a)  | 0.048(4) | 0.044(4) | 0.037(3) | -0.001(3) | 0.014(3) | 0.002(3)  |
| C(6a)  | 0.066(5) | 0.048(4) | 0.040(4) | -0.001(3) | 0.020(4) | 0.009(3)  |
| C(7a)  | 0.067(5) | 0.039(4) | 0.052(4) | -0.001(4) | 0.018(4) | 0.003(3)  |
| C(8a)  | 0.064(5) | 0.039(4) | 0.050(4) | 0.001(3)  | 0.024(4) | -0.002(3) |
| C(9a)  | 0.057(5) | 0.045(4) | 0.040(3) | 0.002(3)  | 0.021(3) | -0.002(3) |
| C(10a) | 0.046(4) | 0.037(3) | 0.040(3) | 0.000(3)  | 0.010(3) | 0.002(3)  |
| C(11a) | 0.083(7) | 0.036(4) | 0.068(6) | -0.005(4) | 0.029(5) | 0.002(4)  |

## (c) Bond distances

| atom | atom | distance | ADC(*) | atom | atom | distance | ADC(*) |
|------|------|----------|--------|------|------|----------|--------|
| O4s  | C2s  | 1.371(7) | 1      | C2a  | C3a  | 1.431(7) | 1      |
| O12b | C9b  | 1.346(6) | 1      | C2a  | C11a | 1.501(9) | 1      |
| O12a | C9a  | 1.355(6) | 1      | C2s  | C3s  | 1.377(8) | 1      |

|      |      |          |       |      |      |          |   |
|------|------|----------|-------|------|------|----------|---|
| N1a  | C2a  | 1.314(6) | 1     | C5b  | C6b  | 1.399(7) | 1 |
| N1a  | C10a | 1.372(6) | 1     | C5b  | C10b | 1.422(7) | 1 |
| N1b  | C2b  | 1.328(6) | 1     | C5a  | C6a  | 1.395(7) | 1 |
| N1b  | C10b | 1.356(6) | 1     | C5a  | C10a | 1.415(7) | 1 |
| N4a  | C3a  | 1.293(7) | 1     | C6b  | C7b  | 1.362(8) | 1 |
| N4a  | C5a  | 1.382(6) | 1     | C6a  | C7a  | 1.350(8) | 1 |
| N4b  | C3b  | 1.312(7) | 1     | C7b  | C8b  | 1.411(8) | 1 |
| N4b  | C5b  | 1.369(6) | 1     | C7a  | C8a  | 1.408(8) | 1 |
| C1s  | C2s  | 1.385(7) | 1     | C8b  | C9b  | 1.362(7) | 1 |
| C1s  | C3s  | 1.387(8) | 76603 | C8a  | C9a  | 1.363(7) | 1 |
| C2b  | C3b  | 1.418(8) | 1     | C9b  | C10b | 1.425(7) | 1 |
| C2b  | C11b | 1.492(9) | 1     | C9a  | C10a | 1.413(7) | 1 |
|      |      |          |       |      |      |          |   |
| O4s  | H3s  | 0.90(5)  |       | C7a  | H3a  | 1.10(5)  |   |
| O12b | H8b  | 1.01(6)  |       | C8b  | H4b  | 0.99(4)  |   |
| O12a | H8a  | 0.87(7)  |       | C8a  | H4a  | 1.00(5)  |   |
| C1s  | H1s  | 1.05(5)  |       | C11b | H5b  | 0.98(8)  |   |
| C3a  | H1a  | 1.06(5)  |       | C11b | H6b  | 0.77(7)  |   |
| C3b  | H1b  | 1.08(6)  |       | C11b | H7b  | 0.90(7)  |   |
| C3s  | H2s  | 0.99(5)  |       | C11a | H5a  | 0.86(6)  |   |
| C6b  | H2b  | 0.92(5)  |       | C11a | H6a  | 0.99(7)  |   |
| C6a  | H2a  | 0.95(5)  |       | C11a | H7a  | 0.90(6)  |   |
| C7b  | H3b  | 1.05(5)  |       |      |      |          |   |

Distances are in angstroms. Estimated standard deviations in the least significant figure are given in parentheses.

#### Bond angles

| atom | atom | atom | angle    | atom | atom | atom | angle    |
|------|------|------|----------|------|------|------|----------|
| C2a  | N1a  | C10a | 117.0(5) | N4a  | C5a  | C10a | 119.3(5) |

|     |      |      |          |      |      |      |          |
|-----|------|------|----------|------|------|------|----------|
| C2b | N1b  | C10b | 116.8(5) | C6a  | C5a  | C10a | 120.5(5) |
| C3a | N4a  | C5a  | 117.4(5) | C5b  | C6b  | C7b  | 119.2(6) |
| C3b | N4b  | C5b  | 117.0(5) | C5a  | C6a  | C7a  | 119.9(6) |
| C2s | C1s  | C3s  | 120.2(6) | C6b  | C7b  | C8b  | 121.2(6) |
| N1b | C2b  | C3b  | 120.8(5) | C6a  | C7a  | C8a  | 120.9(6) |
| N1b | C2b  | C11b | 118.5(7) | C7b  | C8b  | C9b  | 121.0(6) |
| C3b | C2b  | C11b | 120.7(7) | C7a  | C8a  | C9a  | 120.2(6) |
| N1a | C2a  | C3a  | 120.8(5) | O12b | C9b  | C8b  | 124.9(5) |
| N1a | C2a  | C11a | 120.1(6) | O12b | C9b  | C10b | 115.7(5) |
| C3a | C2a  | C11a | 119.1(6) | C8b  | C9b  | C10b | 119.4(5) |
| O4s | C2s  | C1s  | 117.9(6) | O12a | C9a  | C8a  | 117.8(5) |
| O4s | C2s  | C3s  | 123.0(5) | O12a | C9a  | C10a | 121.9(5) |
| C1s | C2s  | C3s  | 119.1(6) | C8a  | C9a  | C10a | 120.3(5) |
| N4a | C3a  | C2a  | 123.5(6) | N1b  | C10b | C5b  | 122.5(5) |
| N4b | C3b  | C2b  | 123.5(6) | N1b  | C10b | C9b  | 118.9(5) |
| C1s | C3s  | C2s  | 120.7(6) | C5b  | C10b | C9b  | 118.6(5) |
| N4b | C5b  | C6b  | 119.9(5) | N1a  | C10a | C5a  | 119.8(5) |
| C6b | C5b  | C10b | 120.7(5) | C5a  | C10a | C9a  | 118.1(5) |
| N4a | C5a  | C6a  | 120.3(5) |      |      |      |          |
| C2s | O4s  | H3s  | 115(4)   | C8a  | C7a  | H3a  | 117(3)   |
| C9b | O12b | H8b  | 116(3)   | C7b  | C8b  | H4b  | 118(3)   |
| C9a | O12a | H8a  | 119(5)   | C9b  | C8b  | H4b  | 121(3)   |
| C2s | C1s  | H1s  | 115(3)   | C7a  | C8a  | H4a  | 122(3)   |
| C3s | C1s  | H1s  | 124(3)   | C9a  | C8a  | H4a  | 117(3)   |
| N4a | C3a  | H1a  | 118(3)   | C2b  | C11b | H5b  | 116(6)   |
| C2a | C3a  | H1a  | 119(3)   | C2b  | C11b | H6b  | 118(6)   |
| N4b | C3b  | H1b  | 120(3)   | C2b  | C11b | H7b  | 115(6)   |
| C2b | C3b  | H1b  | 116(3)   | H5b  | C11b | H6b  | 96(7)    |
| C1s | C3s  | H2s  | 118(3)   | H5b  | C11b | H7b  | 102(7)   |

|     |     |     |        |     |      |     |        |
|-----|-----|-----|--------|-----|------|-----|--------|
| C2s | C3s | H2s | 121(3) | H6b | C11b | H7b | 108(8) |
| C5b | C6b | H2b | 119(3) | C2a | C11a | H5a | 109(5) |
| C7b | C6b | H2b | 122(3) | C2a | C11a | H6a | 117(4) |
| C5a | C6a | H2a | 123(3) | C2a | C11a | H7a | 112(4) |
| C7a | C6a | H2a | 117(3) | H5a | C11a | H6a | 105(6) |
| C6b | C7b | H3b | 118(3) | H5a | C11a | H7a | 116(6) |
| C8b | C7b | H3b | 121(3) | H6a | C11a | H7a | 98(6)  |
| C6a | C7a | H3a | 122(3) |     |      |     |        |

Angles are in degrees. Estimated standard deviations in the least significant figure are given in parentheses.

The stereo pair of 34a (1)

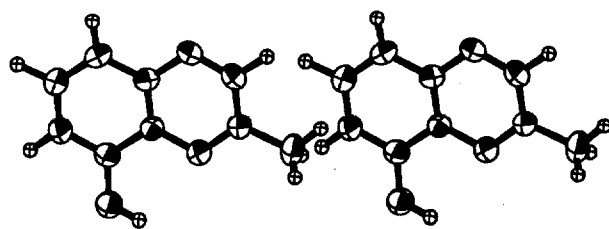

The stereo pair of 34a (2)

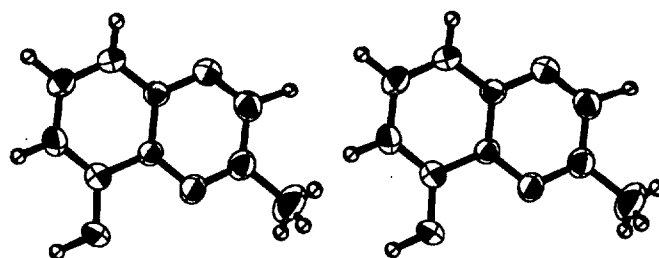

Physical Data of 12–14a,b, 15b, 16b–e, 17b–e, 18b–e, 20b,d,e, 21a–d,f, 22, 23, 32, 37, 38, 42b, 43b, 44a,b, 45b, 46a,b, 47b, 48a–c, 49b,c, 50c, 51, 52a–j,l,m, 53, 54b–d, 55–61, 62b,d–67a,b, 68b–79, 80b–83b,c,d, 84–87a,c, 88a,c–93b,c, 94–99, 103, and 106.

**3-Benzyloxy-2-nitrobenzoic Acid (12).** Using a similar procedure to that used for 83a, the title compound was obtained in 91.2% yield from 11 as colorless crystals after crystallization from isopropyl ether: mp 201–202 °C;  $^1\text{H}$  NMR (DMSO- $d_6$ )  $\delta$  5.30 (2H, s), 7.29–7.47 (5H, m), 7.51–7.70 (3H, m). Anal. ( $\text{C}_{14}\text{H}_{11}\text{NO}_5$ ) C, H, N.

***tert*-Butyl 3-Benzyloxy-2-nitrophenylcarbamate (13).** Using a similar procedure to that used for 6, the title compound was obtained in 53.8% yield from 12, DPPA, and *tert*-BuOH as pale yellow crystals after recrystallization from AcOEt: mp 143–144 °C;  $^1\text{H}$  NMR ( $\text{CDCl}_3$ )  $\delta$  1.51 (9H, s), 5.18 (2H, s), 6.76 (1H, d,  $J = 7.5$  Hz), 7.29–7.45 (6H, m), 7.59 (1H, br s), 7.79 (1H, d,  $J = 7.5$  Hz); MS (FAB)  $m/z$  345 ( $M + 1$ ). Anal. ( $\text{C}_{18}\text{H}_{20}\text{N}_2\text{O}_5$ ) C, H, N.

***tert*-Butyl 3-Benzyloxy-*N*-methyl-2-nitrophenylcarbamate (14a).** Following a procedure similar to method A, the title compound was obtained in 92.9% yield from 13 and methyl iodide as pale yellow crystals after recrystallization from hexane: mp 113–115 °C;  $^1\text{H}$  NMR ( $\text{CDCl}_3$ )  $\delta$  1.38 (9H, br s), 3.19 (3H, s), 5.19 (2H, s), 6.87 (1H, br d,  $J = 7.5$  Hz), 7.00 (1H, d,  $J = 7.5$  Hz), 7.31–7.43 (6H, m). Anal. ( $\text{C}_{19}\text{H}_{22}\text{N}_2\text{O}_5$ ) C, H, N.

***tert*-Butyl 3-Benzyloxy-*N*-ethyl-2-nitrophenylcarbamate (14b).** Following a procedure similar to method A, the title compound was obtained in 92.8% yield from 27 and ethyl iodide as pale yellow crystals after recrystallization from hexane: mp 88–90 °C;  $^1\text{H}$  NMR ( $\text{CDCl}_3$ )  $\delta$  1.17 (3H, t,  $J = 7.5$  Hz), 1.39 (9H, br s), 3.41–3.80 (2H, m), 5.19 (2H, s), 6.86 (1H, br d,  $J = 7.5$  Hz), 7.01 (1H, d,  $J = 7.5$  Hz), 7.29–7.32 (6H, m); MS (ESI)  $m/z$  373 ( $M + 1$ ). Anal. ( $\text{C}_{20}\text{H}_{24}\text{N}_2\text{O}_5$ ) C, H, N.

**3-Benzyloxy-1-ethyl-2-nitroaniline (15b).** Using a similar procedure to that used for 15a, the title compound was obtained in 94.9% yield from 14b as a yellow oil:

$^1\text{H}$  NMR ( $\text{CDCl}_3$ )  $\delta$  1.30 (3H, t,  $J = 7.5$  Hz), 3.13 (2H, q,  $J = 7.5$  Hz), 5.16 (2H, s), 6.31 (1H, d,  $J = 7.5$  Hz), 6.38 (1H, d,  $J = 7.5$  Hz), 7.21 (1H, t,  $J = 7.5$  Hz), 7.28–7.49 (5H, m). Anal. ( $\text{C}_{15}\text{H}_{16}\text{N}_2\text{O}_3$ ) C, H, N.

**1-(*N*-Acetyl-*N*-ethyl)-3-benzyloxy-2-nitroaniline (16b).** Using a similar procedure to that used for **16a**, the title compound was obtained in 67.3% yield from **15b** and acetyl chloride as a yellow oil:  $^1\text{H}$  NMR ( $\text{CDCl}_3$ )  $\delta$  1.15 (3H, t,  $J = 7.5$  Hz), 2.18 (3H, s), 3.16–4.10 (2H, m), 5.13 (2H, s), 6.90 (1H, d,  $J = 7.5$  Hz), 7.18 (1H, d,  $J = 7.5$  Hz), 7.33–7.50 (6H, m). Anal. ( $\text{C}_{17}\text{H}_{18}\text{N}_2\text{O}_4$ ) C, H, N.

**4-Benzyloxy-1-ethyl-2-methyl-1*H*-benzimidazole (17b).** Using a similar procedure to that used for **17a**, the title compound was obtained in 34.2% yield from **16b** as a pale yellow oil:  $^1\text{H}$  NMR ( $\text{CDCl}_3$ )  $\delta$  1.40 (3H, t,  $J = 7.5$  Hz), 2.61 (3H, s), 4.13 (2H, q,  $J = 7.5$  Hz), 5.37 (2H, s), 6.67 (1H, d,  $J = 7.5$  Hz), 6.91 (1H, d,  $J = 7.5$  Hz), 7.09 (1H, t,  $J = 7.5$  Hz), 7.26–7.40 (3H, m), 7.51 (2H, br d,  $J = 7.5$  Hz); MS (FAB)  $m/z$  374 ( $M + 1$ ). Anal. ( $\text{C}_{17}\text{H}_{18}\text{N}_2\text{O}$ ) C, H, N.

**1-Ethyl-4-hydroxy-2-methyl-1*H*-benzimidazole (18b).** Using a similar procedure to that used for **18a**, the title compound was obtained in 89.9% yield from **17b** as pale brown crystals after crystallization from isopropyl ether: mp 187–190 °C;  $^1\text{H}$  NMR ( $\text{CDCl}_3$ )  $\delta$  1.40 (3H, t,  $J = 7.5$  Hz), 2.68 (3H, s), 4.13 (2H, q,  $J = 7.5$  Hz), 6.81 (1H, d,  $J = 7.5$  Hz), 6.84 (1H, d,  $J = 7.5$  Hz), 7.17 (1H, t,  $J = 7.5$  Hz); MS (FAB)  $m/z$  177 ( $M + 1$ ). Anal. ( $\text{C}_{10}\text{H}_{12}\text{N}_2\text{O}$ ) C, H, N.

**3-Benzyloxy-1-(*N*-methoxyacetyl-*N*-methyl)-2-nitroaniline (16c).** Using a similar procedure to that used for **16a**, the title compound was obtained in 92.7% yield from **15a** and methoxyacetyl chloride as colorless crystals after crystallization from isopropyl ether: mp 111–113 °C;  $^1\text{H}$  NMR ( $\text{CDCl}_3$ )  $\delta$  3.20 (3H, s), 3.34 (3H, s), 3.79 (1H, d,  $J = 15$  Hz), 3.87 (1H, d,  $J = 15$  Hz), 5.22 (2H, s), 6.89 (1H, d,  $J = 7.5$  Hz), 7.13 (1H, d,  $J = 7.5$  Hz), 7.29–7.42 (5H, m), 7.45 (1H, t,  $J = 7.5$  Hz); MS (ESI)  $m/z$  331 ( $M + 1$ ). Anal. ( $\text{C}_{17}\text{H}_{18}\text{N}_2\text{O}_5$ ) C, H, N.

**4-Benzyloxy-2-methoxymethyl-1-methyl-1H-benzimidazole (17c).** Using a similar procedure to that used for **17a**, the title compound was obtained in 76.7% yield from **16c** as pale gray crystals after crystallization from isopropyl ether: mp 120–122 °C; <sup>1</sup>H NMR (CDCl<sub>3</sub>) δ 3.38 (3H, s), 3.82 (3H, s), 4.78 (2H, s), 5.38 (2H, s), 6.67 (1H, d, *J* = 7.5 Hz), 6.93 (1H, d, *J* = 7.5 Hz), 7.14 (1H, t, *J* = 7.5 Hz), 7.23–7.39 (3H, m), 7.51 (2H, br d, *J* = 7.5 Hz); MS (ESI) *m/z* 283 (*M* + 1). Anal. (C<sub>17</sub>H<sub>18</sub>N<sub>2</sub>O<sub>2</sub>) C, H, N.

**4-Hydroxy-2-methoxymethyl-1-methyl-1H-benzimidazole (18c).** Using a similar procedure to that used for **18a**, the title compound was obtained in 89.9% yield from **17c** as pale gray crystals after crystallization from isopropyl ether: mp 162–163 °C; <sup>1</sup>H NMR (CDCl<sub>3</sub>) δ 3.33 (3H, s), 3.81 (3H, s), 4.81 (2H, s), 6.85 (1H, d, *J* = 7.5 Hz), 6.87 (1H, d, *J* = 7.5 Hz), 7.22 (1H, t, *J* = 7.5 Hz); MS (ESI) *m/z* 193 (*M* + 1). Anal. (C<sub>10</sub>H<sub>12</sub>N<sub>2</sub>O<sub>2</sub>) C, H, N.

**3-Benzyloxy-1-(N-ethoxycarbonylacetyl-N-methyl)-2-nitroaniline (16d).** Using a similar procedure to that used for **16a**, the title compound was obtained in 93.3% yield from **15a** and ethyl malonyl chloride as a yellow oil: <sup>1</sup>H NMR (CDCl<sub>3</sub>) δ 1.24 (3H, t, *J* = 7.5 Hz), 3.21 (3H, s), 3.23 (2H, s), 4.15 (2H, s), 5.21 (2H, s), 6.99 (1H, d, *J* = 7.5 Hz), 7.14 (1H, d, *J* = 7.5 Hz), 7.32–7.52 (6H, m); MS (ESI) *m/z* 373 (*M* + 1). Anal. (C<sub>19</sub>H<sub>20</sub>N<sub>2</sub>O<sub>6</sub>) C, H, N.

**4-Benzyloxy-2-ethoxycarbonylmethyl-1-methyl-1H-benzimidazole (17d).** Using a similar procedure to that used for **17a**, the title compound was obtained in 31.3% yield from **16d** as colorless crystals after crystallization from diethyl ether: mp 105–106 °C; <sup>1</sup>H NMR (CDCl<sub>3</sub>) δ 1.28 (3H, t, *J* = 7 Hz), 3.76 (3H, s), 4.06 (2H, s), 4.20 (2H, q, *J* = 7 Hz), 5.37 (2H, s), 6.69 (1H, d, *J* = 7.5 Hz), 6.93 (1H, d, *J* = 7.5 Hz), 7.13 (1H, t, *J* = 7.5 Hz), 7.25–7.39 (3H, m), 7.50 (2H, br d, *J* = 7.5 Hz); MS (ESI) *m/z* 325 (*M* + 1). Anal. (C<sub>19</sub>H<sub>20</sub>N<sub>2</sub>O<sub>3</sub>) C, H, N.

**2-Ethoxycarbonylmethyl-4-hydroxy-1-methyl-1H-benzimidazole (18d).** Using a similar procedure to that used for **18a**, the title compound was obtained in 75.6% yield from **17d** as pale gray crystals after crystallization from diethyl ether: mp 167–170

°C;  $^1\text{H}$  NMR ( $\text{CDCl}_3$ )  $\delta$  1.23 (3H, t,  $J = 7$  Hz), 3.72 (3H, s), 4.13 (2H, s), 4.17 (2H, q,  $J = 7$  Hz), 6.81 (1H, d,  $J = 7.5$  Hz), 6.84 (1H, d,  $J = 7.5$  Hz), 7.19 (1H, t,  $J = 7.5$  Hz); MS (ESI)  $m/z$  235 ( $M + 1$ ). Anal. ( $\text{C}_{12}\text{H}_{14}\text{N}_2\text{O}_3$ ) C, H, N.

**1-(*N*-Benzoyl-*N*-methyl)-3-benzyloxy-2-nitroaniline (16e).** Using a similar procedure to that used for **16a**, the title compound was obtained in 93.3% yield from **15a** and benzoyl chloride as a pale yellow oil:  $^1\text{H}$  NMR ( $\text{CDCl}_3$ )  $\delta$  3.37 (3H, s), 5.17 (2H, s), 6.60 (1H, br d,  $J = 7.5$  Hz), 6.93 (1H, d,  $J = 7.5$  Hz), 7.12–7.50 (11H, m). Anal. ( $\text{C}_{22}\text{H}_{20}\text{N}_2\text{O}_4$ ) C, H, N.

**4-Benzyloxy-1-methyl-2-phenyl-1*H*-benzimidazole (17e).** Using a similar procedure to that used for **17a**, the title compound was obtained in 86.0% yield from **16e** as colorless crystals after crystallization from diethyl ether: mp 118–120 °C;  $^1\text{H}$  NMR ( $\text{CDCl}_3$ )  $\delta$  3.85 (3H, s), 5.47 (2H, s), 6.73 (1H, d,  $J = 7.5$  Hz), 6.99 (1H, d,  $J = 7.5$  Hz), 7.17 (1H, t,  $J = 7.5$  Hz), 7.25–7.39 (3H, m), 7.48–7.57 (5H, m), 7.77–7.84 (2H, m). Anal. ( $\text{C}_{21}\text{H}_{18}\text{N}_2\text{O}$ ) C, H, N.

**4-Hydroxy-1-methyl-2-phenyl-1*H*-benzimidazole (18e).** Using a similar procedure to that used for **18a**, the title compound was obtained in 68.5% yield from **17e** as pale gray crystals after crystallization from EtOH: mp 210–211 °C;  $^1\text{H}$  NMR ( $\text{DMSO}-d_6$ )  $\delta$  3.82 (3H, s), 6.59 (1H, d,  $J = 7.5$  Hz), 7.00 (1H, d,  $J = 7.5$  Hz), 7.07 (1H, t,  $J = 7.5$  Hz), 7.50–7.62 (3H, m), 7.79–7.87 (2H, m). Anal. ( $\text{C}_{14}\text{H}_{12}\text{N}_2\text{O}$ ) C, H, N.

**4-Hydroxy-2-Methoxy-1-methyl-1*H*-benzimidazole (21a).** Using a similar procedure to that used for **18a**, the title compound was obtained in 87.4% yield from **20a** as colorless crystals after crystallization from diethyl ether: mp 226–229 °C;  $^1\text{H}$  NMR ( $\text{DMSO}-d_6$ )  $\delta$  3.48 (3H, s), 4.08 (3H, s), 6.49 (1H, d,  $J = 7.5$  Hz), 6.76 (1H, d,  $J = 7.5$  Hz), 6.88 (1H, t,  $J = 7.5$  Hz), 9.39 (1H, br s). Anal. ( $\text{C}_9\text{H}_{10}\text{N}_2\text{O}_2$ ) C, H, N.

**4-Benzyloxy-2-ethoxy-1-methyl-1*H*-benzimidazole (20b).** Using a similar procedure to that used for **20a**, the title compound was obtained in 85.1% yield from **19** as colorless crystals after crystallization from hexane–isopropyl ether: mp 99–100 °C;  $^1\text{H}$

NMR (CDCl<sub>3</sub>)  $\delta$  1.47 (3H, t,  $J$  = 7.5 Hz), 3.51 (3H, s), 4.66 (2H, q,  $J$  = 7.5 Hz), 5.40 (2H, s), 6.61 (1H, d,  $J$  = 7.5 Hz), 6.75 (1H, d,  $J$  = 7.5 Hz), 6.97 (1H, t,  $J$  = 7.5 Hz), 7.22–7.38 (3H, m), 7.49 (2H, d,  $J$  = 7.5 Hz). Anal. (C<sub>17</sub>H<sub>18</sub>N<sub>2</sub>O<sub>2</sub>) C, H, N.

**2-Ethoxy-4-hydroxy-1-methyl-1H-benzimidazole (21b).** Using a similar procedure to that used for **19a**, the title compound was obtained in 72.6% yield from **20b** as colorless crystals after crystallization from hexane–isopropyl ether: mp 164–165 °C; <sup>1</sup>H NMR (CDCl<sub>3</sub>)  $\delta$  1.43 (3H, t,  $J$  = 6.5 Hz), 3.51 (3H, s), 4.54 (2H, q,  $J$  = 6.5 Hz), 6.71 (2H, d,  $J$  = 7.5 Hz), 7.03 (1H, t,  $J$  = 7.5 Hz), 8.05 (1H, br s). Anal. (C<sub>10</sub>H<sub>12</sub>N<sub>2</sub>O<sub>2</sub>) C, H, N.

**4-Hydroxy-1-methyl-2-methylamino-1H-benzimidazole (21c).** Using a similar procedure to that used for **18a**, the title compound was obtained in 73.9% yield from **20c** as a colorless amorphous solid: <sup>1</sup>H NMR (CDCl<sub>3</sub>–CD<sub>3</sub>OD)  $\delta$  3.09 (3H, s), 3.48 (3H, s), 6.60 (1H, d,  $J$  = 7.5 Hz), 6.69 (1H, d,  $J$  = 7.5 Hz), 6.98 (1H, t,  $J$  = 7.5 Hz); MS (ESI)  $m/z$  178 ( $M$  + 1). Anal. (C<sub>9</sub>H<sub>11</sub>N<sub>3</sub>O) C, H, N.

**4-Benzyloxy-2-dimethylamino-1-methyl-1H-benzimidazole (20d).** Following a procedure similar to method A, the title compound was obtained in 47.5% yield from **20c** and methyl iodide as a colorless oil: <sup>1</sup>H NMR (CDCl<sub>3</sub>)  $\delta$  2.99 (6H, s), 3.61 (3H, s), 5.40 (2H, s), 6.60 (1H, d,  $J$  = 8 Hz), 6.79 (1H, d,  $J$  = 8 Hz), 6.98 (1H, t,  $J$  = 8 Hz), 7.29–7.43 (3H, m), 7.50 (2H, d,  $J$  = 8 Hz); MS (ESI)  $m/z$  282 ( $M$  + 1). Anal. (C<sub>17</sub>H<sub>19</sub>N<sub>3</sub>O) C, H, N.

**2-Dimethylamino-4-hydroxy-1-methyl-1H-benzimidazole (21d).** Using a similar procedure to that used for **18a**, the title compound was obtained in 78.0% yield from **20d** as pale brown crystals after crystallization from isopropyl ether: mp 177–179 °C; <sup>1</sup>H NMR (CDCl<sub>3</sub>)  $\delta$  2.93 (6H, s), 3.60 (3H, s), 6.71 (2H, br d,  $J$  = 8 Hz), 7.03 (1H, t,  $J$  = 8 Hz); MS (ESI)  $m/z$  192 ( $M$  + 1). Anal. (C<sub>10</sub>H<sub>13</sub>N<sub>3</sub>O) C, H, N.

**(±)-4-Benzyloxy-2-(1-hydroxyethyl)-1-methyl-1H-benzimidazole (20e).** Using a similar procedure to that used for **8**, the title compound was obtained in 19.4%

yield from **19** and lactic acid as colorless crystals after crystallization from diethyl ether:

mp 149–151 °C;  $^1\text{H}$  NMR ( $\text{DMSO}-d_6$ )  $\delta$  1.57 (3H, t,  $J = 7.5$  Hz), 3.81 (3H, s), 5.03 (1H, quint,  $J = 7.5$  Hz), 5.33 (2H, s), 5.55 (1H, d,  $J = 7.5$  Hz), 6.77 (1H, dd,  $J = 7.5$ , 2.5 Hz), 7.07–7.14 (2H, m), 7.29–7.43 (3H, m), 7.50 (2H, d,  $J = 7.5$  Hz); MS (ESI)  $m/z$  283 ( $M + 1$ ). Anal. ( $\text{C}_{17}\text{H}_{18}\text{N}_2\text{O}_2$ ) C, H, N.

**2-Acetyl-4-hydroxy-1-methyl-1H-benzimidazole (21f).** Using a similar procedure to that used for **18a**, the title compound was obtained in 92.5% yield from **20f** as pale brown crystals after crystallization from isopropyl ether: mp 154–155 °C;  $^1\text{H}$  NMR ( $\text{CDCl}_3$ )  $\delta$  2.80 (3H, s), 4.11 (3H, s), 6.83 (1H, d,  $J = 8.5$  Hz), 6.96 (1H, d,  $J = 8.5$  Hz), 7.33 (1H, t,  $J = 8.5$  Hz); MS (ESI)  $m/z$  191 ( $M + 1$ ). Anal. ( $\text{C}_{10}\text{H}_{10}\text{N}_2\text{O}_2$ ) C, H, N.

**3-Hydroxy-1-methyl-1,2-phenylenediamine (22).** Using a similar procedure to that used for **18a**, the title compound was obtained in 91.8% yield from **15a** as brown solid after crystallization from hexane–isopropyl ether: mp 94–97 °C;  $^1\text{H}$  NMR ( $\text{DMSO}-d_6$ )  $\delta$  2.68 (3H, d,  $J = 4.5$  Hz), 3.80 (2H, br s), 4.52 (1H, q,  $J = 4.5$  Hz), 5.98 (1H, d,  $J = 8.5$  Hz), 6.13 (1H, d,  $J = 8.5$  Hz), 6.38 (1H, t,  $J = 8.5$  Hz), 8.73 (1H, br s); MS (ESI)  $m/z$  139 ( $M + 1$ ). Anal. ( $\text{C}_7\text{H}_{10}\text{N}_2\text{O}$ ) C, H, N.

**3-[[2,6-Dimethyl-3-[N-methyl-N-[(E)-4-(N-methylcarbamoyl)cinnamamidoacetyl]amino]benzyl]oxy]-1-methyl-1,2-phenylenediamine (23).** Following a procedure similar to method A, the title compound was obtained in 69.8% yield from **22** and **50b** as a brown amorphous solid:  $^1\text{H}$  NMR ( $\text{DMSO}-d_6$ )  $\delta$   $^1\text{H}$  NMR ( $\text{CDCl}_3$ )  $\delta$  2.24 (3H, s), 2.40 (3H, s), 2.71 (3H, d,  $J = 5$  Hz), 2.79 (3H, d,  $J = 5$  Hz), 3.10 (3H, s), 3.50 (1H, dd,  $J = 17$ , 5 Hz), 3.67 (1H, dd,  $J = 17$ , 5 Hz), 3.96 (2H, br s), 4.68 (1H, q,  $J = 5$  Hz), 5.03 (2H, s), 6.20 (1H, d,  $J = 8$  Hz), 6.49–6.59 (2H, m), 6.88 (1H, d,  $J = 15$  Hz), 7.22 (1H, d,  $J = 8$  Hz), 7.27 (1H, d,  $J = 8$  Hz), 7.42 (1H, d,  $J = 15$  Hz), 7.63 (2H, d,  $J = 8$  Hz), 7.85 (2H, d,  $J = 8$  Hz), 8.25

(1H, t,  $J = 5$  Hz), 8.48 (1H, q,  $J = 5$  Hz); MS (ESI)  $m/z$  530 ( $M + 1$ ). Anal.

( $C_{30}H_{35}N_5O_4$ ) C, H, N.

**8-Hydroxy-2-methylquinazoline (32).** Using a similar procedure to that used for **9**, the title compound was obtained in 71.7% yield from **31** as colorless crystals after crystallization from isopropyl ether: mp 135–137 °C;  $^1H$  NMR ( $CDCl_3$ )  $\delta$  2.89 (3H, s), 7.32 (1H, d,  $J = 7.5$  Hz), 7.41 (1H, d,  $J = 7.5$  Hz), 7.49 (1H, t,  $J = 7.5$  Hz), 9.30 (1H, s); MS (FAB)  $m/z$  161 ( $M + 1$ ). Anal. ( $C_9H_8N_2O$ ) C, H, N.

**7-Methoxy-2-methylquinoline (37).** Using a similar procedure to that used for **31**, the title compound was obtained in 95.0% yield from **36b** as a colorless oil:  $^1H$  NMR ( $CDCl_3$ )  $\delta$  2.61 (3H, s), 4.00 (3H, s), 6.80 (1H, dd,  $J = 8, 2$  Hz), 7.27 (1H, d,  $J = 2$  Hz), 7.52–7.62 (2H, m), 8.47 (1H, d,  $J = 8$  Hz). Anal. ( $C_{11}H_{11}NO$ ) C, H, N.

**7-Hydroxy-2-methylquinoline (38).** Using a similar procedure to that used for **9**, the title compound was obtained in 81.8% yield from **37** as colorless crystals after crystallization from isopropyl ether: mp 245–246 °C;  $^1H$  NMR ( $DMSO-d_6$ )  $\delta$  2.61 (3H, s), 6.85 (1H, d,  $J = 8$  Hz), 7.30 (1H, d,  $J = 8$  Hz), 7.36 (1H, d,  $J = 8$  Hz), 8.39 (1H, d,  $J = 8$  Hz). Anal. ( $C_{10}H_9NO$ ) C, H, N.

**3-Amino-1-(tert-butyldiphenylsiloxymethyl)-2,6-dichlorobenzene (44a).** Using a similar procedure to that used for **19**, the title compound was obtained in 87.1% yield from **43a** as colorless crystals after crystallization from MeOH: mp 117–118 °C;  $^1H$  NMR ( $CDCl_3$ )  $\delta$  1.05 (9H, s), 4.07 (2H, br s), 4.87 (2H, s), 6.66 (1H, d,  $J = 9$  Hz), 7.08 (1H, d,  $J = 9$  Hz), 7.30–7.50 (6H, m), 7.70–7.84 (4H, m). Anal. ( $C_{23}H_{25}Cl_2NOSi$ ) C, H, N.

**1-(tert-Butyldiphenylsiloxymethyl)-2,6-dichloro-3-[N-methyl-N-(phthalimidoacetyl)amino]benzene (46a).** Following a procedure similar to method A, the title compound was obtained in 88.5% yield from **45a** and methyl iodide as colorless crystals after crystallization from isopropyl ether: mp 167–172 °C;  $^1H$  NMR

(CDCl<sub>3</sub>)  $\delta$  1.06 (9H, s), 3.20 (3H, s), 4.04 (2H, s), 4.98 (2H, s), 7.31–7.51 (9H, m), 7.65–7.79 (6H, m), 7.80–7.92 (2H, m). Anal. (C<sub>34</sub>H<sub>32</sub>Cl<sub>2</sub>N<sub>2</sub>O<sub>4</sub>Si) C, H, N.

**1-[*tert*-Butyldiphenylsiloxymethyl]-2,6-dichloro-3-[*N*-methyl-*N*-[(*E*)-4-(*N*-methylcarbamoyl)cinnamamidoacetyl]amino]benzene (48a).** Following a procedure similar to method E, the title compound was obtained in 88.6% yield from **47a** and (*E*)-4-(*N*-methylcarbamoyl)cinnamic acid<sup>23</sup> as pale yellow crystals after crystallization from AcOEt: mp 219–222 °C; <sup>1</sup>H NMR (CDCl<sub>3</sub>)  $\delta$  1.05 (9H, s), 3.02 (3H, d, *J* = 5 Hz), 3.21 (3H, s), 3.56 (1H, dd, *J* = 17, 4 Hz), 3.93 (1H, dd, *J* = 17, 5 Hz), 4.91 (1H, d, *J* = 10 Hz), 4.98 (1H, d, *J* = 10 Hz), 6.15 (1H, br d, *J* = 5 Hz), 6.51 (1H, d, *J* = 15 Hz), 6.63 (1H, br s), 7.19–7.28 (2H, m), 7.32–7.48 (6H, m), 7.50–7.60 (3H, m), 7.68–7.78 (6H, m); MS (FAB) *m/z* 688 (*M* + 1). Anal. (C<sub>37</sub>H<sub>39</sub>Cl<sub>2</sub>N<sub>3</sub>O<sub>4</sub>Si) C, H, N.

**2,6-Dimethyl-3-nitrobenzyl alcohol (42b).** Using a similar procedure to that used for **82a**, the title compound was obtained in 80.9% yield from **41** as pale yellow crystals after recrystallization from isopropyl ether: mp 100–102 °C; <sup>1</sup>H NMR (CDCl<sub>3</sub>)  $\delta$  1.44 (1H, t, *J* = 5 Hz), 2.50 (3H, s), 2.56 (3H, s), 4.82 (2H, d, *J* = 5 Hz), 7.17 (1H, d, *J* = 8 Hz), 7.66 (1H, d, *J* = 8 Hz). Anal. (C<sub>9</sub>H<sub>11</sub>NO<sub>3</sub>) C, H, N.

**1-(*tert*-Butyldiphenylsiloxymethyl)-2,6-dimethyl-3-nitrobenzene (43b).** Using a similar procedure to that used for **42a**, the title compound was obtained in 96.2% yield from **42b** as a pale yellow oil: <sup>1</sup>H NMR (CDCl<sub>3</sub>)  $\delta$  1.03 (9H, s), 2.20 (3H, s), 2.38 (3H, s), 5.73 (2H, s), 7.06 (1H, d, *J* = 8 Hz), 7.33–7.49 (6H, m), 7.58–7.73 (5H, m). Anal. (C<sub>25</sub>H<sub>29</sub>NO<sub>3</sub>Si) C, H, N.

**3-Amino-1-(*tert*-butyldiphenylsiloxymethyl)-2,6-dichlorobenzene (44b).** Using a similar procedure to that used for **19**, the title compound was obtained in 97.8% yield from **43b** as a pale yellow oil: <sup>1</sup>H NMR (CDCl<sub>3</sub>)  $\delta$  1.04 (9H, s), 2.09 (3H, s), 2.11 (3H, s), 3.48 (2H, br s), 4.70 (2H, s), 6.58 (1H, d, *J* = 8 Hz), 6.71 (1H, d, *J* = 8 Hz), 7.33–7.48 (6H, m), 7.66–7.73 (4H, m); MS (ESI) *m/z* 390 (*M* + 1). Anal. (C<sub>25</sub>H<sub>31</sub>NOSi) C, H, N.

**1-(*tert*-Butyldiphenylsiloxymethyl)-2,6-dimethyl-3-(*N*-phthalimidoacetyl)aminobenzene (45b).** Using a similar procedure to that used for **45a**, the title compound was obtained in 93.6% yield from **44b** and *N*-phthalimidoacetyl chloride as colorless crystal after crystallization from MeCN: mp 207–210 °C; <sup>1</sup>H NMR (CDCl<sub>3</sub>) δ 1.02 (9H, s), 2.12 (3H, s), 2.19 (3H, s), 4.52 (2H, s), 4.70 (2H, s), 6.95 (1H, d, *J* = 8 Hz), 7.25–7.50 (7H, m), 7.63–7.80 (6H, m), 7.86–7.96 (2H, m); MS (ESI) *m/z* 577 (*M* + 1). Anal. (C<sub>35</sub>H<sub>36</sub>N<sub>2</sub>O<sub>4</sub>Si) C, H, N.

**1-(*tert*-Butyldiphenylsiloxymethyl)-2,6-dimethyl-3-[*N*-methyl-*N*-(*N*-phthalimidoacetyl)amino]benzene (46b).** Following a procedure similar to method A, the title compound was obtained in 69.2% yield from **45b** and methyl iodide as colorless crystals after crystallization from AcOEt: mp 180–182 °C; <sup>1</sup>H NMR (CDCl<sub>3</sub>) δ 1.04 (9H, s), 2.21 (3H, s), 2.27 (3H, s), 3.17 (3H, s), 3.82 (1H, d, *J* = 17 Hz), 4.12 (1H, d, *J* = 17 Hz), 4.78 (2H, s), 7.09 (1H, d, *J* = 8 Hz), 7.15 (1H, d, *J* = 8 Hz), 7.34–7.49 (6H, m), 7.65–7.73 (6H, m), 7.80–7.88 (2H, m); MS (ESI) *m/z* 591 (*M* + 1). Anal. (C<sub>36</sub>H<sub>38</sub>N<sub>2</sub>O<sub>4</sub>Si) C, H, N.

**3-[*N*-Aminoacetyl-*N*-methyldamino]-1-[*tert*-butyldiphenylsiloxymethyl]-2,6-dimethylbenzene (47b).** Using a similar procedure to that used for **47a**, the title compound was obtained in 93.5% yield from **46b** as a pale yellow amorphous solid: <sup>1</sup>H NMR (CDCl<sub>3</sub>) δ 1.03 (9H, s), 2.02 (3H, s), 2.22 (3H, s), 2.82 (1H, d, *J* = 17 Hz), 3.09 (1H, d, *J* = 17 Hz), 3.15 (3H, s), 4.72 (2H, s), 6.92 (1H, d, *J* = 8 Hz), 7.01 (1H, d, *J* = 8 Hz), 7.32–7.49 (6H, m), 7.62–7.70 (4H, m); MS (ESI) *m/z* 461 (*M* + 1). Anal. (C<sub>28</sub>H<sub>36</sub>N<sub>2</sub>O<sub>2</sub>Si) C, H, N.

**1-[*tert*-Butyldiphenylsiloxymethyl]-2,6-dimethyl-3-[*N*-methyl-*N*-[(*E*)-4-(*N*-methylcarbamoyl)cinnamamidoacetyl]amino]benzene (48b).** Following a procedure similar to method E, the title compound was obtained in 69.2% yield from **47b** and (*E*)-4-(*N*-methylcarbamoyl)cinnamic acid<sup>23</sup> as pale yellow crystals after crystallization from AcOEt: mp 204–208 °C; <sup>1</sup>H NMR (CDCl<sub>3</sub>) δ 1.05 (9H, s), 2.05 (3H, s), 2.26 (3H, s), 3.02 (3H, d, *J* = 5 Hz), 3.20 (3H, s), 3.52 (1H, dd, *J* = 17, 5 Hz), 3.87 (1H, dd, *J* =

17, 5 Hz), 4.73 (2H, s), 6.16 (1H, br d,  $J = 5$  Hz), 6.51 (1H, d,  $J = 15$  Hz), 6.69 (1H, br t,  $J = 5$  Hz), 6.98 (1H, d,  $J = 8$  Hz), 7.06 (1H, d,  $J = 8$  Hz), 7.35–7.48 (6H, m), 7.51–7.60 (3H, m), 7.65–7.80 (6H, m); MS (ESI)  $m/z$  648 ( $M + 1$ ). Anal. ( $C_{39}H_{45}N_3O_3Si$ ) C, H, N.

**3-[*N*-[(*E*)-3-(6-Acetylaminopyridin-3-yl)acryloylglycyl]-*N*-methylamino]-1-(*tert*-butyldiphenylsiloxymethyl)-2,6-dimethylbenzene (48c).** Following a procedure similar to method E, the title compound was obtained in 76.2% yield from **47b** and (*E*)-3-(6-acetamidopyridine-3-yl)acrylic acid<sup>23</sup> as colorless crystals after crystallization from AcOEt: mp 200–202 °C;  $^1H$  NMR ( $CDCl_3$ )  $\delta$  1.05 (9H, s), 2.04 (3H, s), 2.21 (3H, s), 2.26 (3H, s), 3.20 (3H, s), 3.52 (1H, dd,  $J = 17, 5$  Hz), 3.87 (1H, dd,  $J = 17, 5$  Hz), 4.73 (2H, s), 6.45 (1H, d,  $J = 15$  Hz), 6.69 (1H, br t,  $J = 5$  Hz), 6.98 (1H, d,  $J = 8$  Hz), 7.07 (1H, d,  $J = 8$  Hz), 7.35–7.47 (6H, m), 7.64–7.71 (4H, m), 7.84 (1H, dd,  $J = 8, 3$  Hz), 8.06 (1H, br s), 8.21 (1H, br d,  $J = 8$  Hz), 8.35 (1H, br s); MS (ESI)  $m/z$  649 ( $M + 1$ ). Anal. ( $C_{38}H_{44}N_4O_4Si$ ) C, H, N.

**2,6-Dimethyl-1-hydroxymethyl-3-[*N*-methyl-*N*-[(*E*)-4-(*N*-methylcarbamoyl)cinnamamidoacetyl]amino]benzene (49b).** Using a similar procedure to that used for **49a**, the title compound was obtained in 95.8% yield from **48b** as colorless crystals after crystallization from AcOEt: mp 261–263 °C;  $^1H$  NMR ( $DMSO-d_6$ )  $\delta$  2.27 (3H, s), 2.40 (3H, s), 2.79 (3H, d,  $J = 5$  Hz), 3.08 (3H, s), 3.43 (1H, dd,  $J = 17, 5$  Hz), 3.65 (1H, dd,  $J = 17, 5$  Hz), 4.53 (2H, d,  $J = 5$  Hz), 4.88 (1H, t,  $J = 5$  Hz), 6.89 (1H, d,  $J = 15$  Hz), 7.15 (2H, s), 7.41 (1H, d,  $J = 15$  Hz), 7.64 (2H, d,  $J = 8$  Hz), 7.85 (2H, d,  $J = 8$  Hz), 8.21 (1H, br t,  $J = 5$  Hz), 8.48 (1H, br d,  $J = 8$  Hz); MS (ESI)  $m/z$  410 ( $M + 1$ ). Anal. ( $C_{23}H_{27}N_3O_4$ ) C, H, N.

**3-[*N*-[(*E*)-3-[6-Acetylaminopyridin-3-yl]acryloylglycyl]-*N*-methylamino]-1-hydroxymethyl-2,6-dimethylbenzene (49c).** Using a similar procedure to that used for **49a**, the title compound was obtained in 97.7% yield from **48c** as colorless crystals after crystallization from AcOEt: mp 215–216 °C;  $^1H$  NMR ( $DMSO-d_6$ )  $\delta$  2.27 (3H, s), 2.40 (3H, s), 2.79 (3H, d,  $J = 5$  Hz), 3.08 (3H, s), 3.43 (1H, dd,  $J =$

17, 5 Hz), 3.65 (1H, dd,  $J = 17, 5$  Hz), 4.53 (2H, d,  $J = 5$  Hz), 4.88 (1H, t,  $J = 5$  Hz), 6.89 (1H, d,  $J = 15$  Hz), 7.15 (2H, s), 7.41 (1H, d,  $J = 15$  Hz), 7.64 (2H, d,  $J = 8$  Hz), 7.85 (2H, d,  $J = 8$  Hz), 8.21 (1H, br t,  $J = 5$  Hz), 8.48 (1H, br d,  $J = 8$  Hz); MS (ESI)  $m/z$  411 ( $M + 1$ ). Anal. ( $C_{22}H_{26}N_4O_4$ ) C, H, N.

**3-[N-[(E)-3-[6-Acetylaminopyridin-3-yl]acryloylglycyl]-N-methylamino]-1-chloromethyl-2,6-dimethylbenzene (50c).** Using a similar procedure to that used for **50b**, the title compound was obtained in 91.4% yield from **48c** as pale yellow crystals after crystallization from AcOEt-hexane: mp 218–221 °C;  $^1H$  NMR (DMSO- $d_6$ )  $\delta$  2.11 (3H, s), 2.28 (3H, s), 2.43 (3H, s), 3.09 (3H, s), 3.41 (1H, dd,  $J = 17, 5$  Hz), 3.60 (1H, dd,  $J = 17, 5$  Hz), 4.84 (2H, s), 6.76 (1H, d,  $J = 15$  Hz), 7.21 (1H, d,  $J = 8$  Hz), 7.27 (1H, d,  $J = 8$  Hz), 7.37 (1H, d,  $J = 15$  Hz), 7.98 (1H, dd,  $J = 8, 2$  Hz), 8.11 (1H, d,  $J = 8$  Hz), 8.17 (1H, t,  $J = 5$  Hz), 8.17 (1H, br t,  $J = 5$  Hz), 8.47 (1H, d,  $J = 2$  Hz); MS (ESI)  $m/z$  429 ( $M + 1$ ). Anal. ( $C_{22}H_{25}ClN_4O_3$ ) C, H, N.

**4-[[2,6-Dichloro-3-[N-methyl-N-[(E)-4-(N-methylcarbamoyl)cinnamamidoacetyl]amino]benzyl]oxy]-2-methylbenzoxazole (51).** Following a procedure similar to method A, the title compound was obtained in 85.7% yield from **50a** and 4-hydroxy-2-methylbenzoxazole as a colorless amorphous solid;  $^1H$  NMR ( $CDCl_3$ )  $\delta$  2.61 (3H, s), 3.02 (3H, d,  $J = 5$  Hz), 3.28 (3H, s), 3.67 (1H, dd,  $J = 17, 4$  Hz), 3.94 (1H, dd,  $J = 17, 5$  Hz), 5.58 (1H, d,  $J = 10$  Hz), 5.61 (1H, d,  $J = 10$  Hz), 6.15 (1H, br d,  $J = 5$  Hz), 6.52 (1H, d,  $J = 15$  Hz), 6.68 (1H, br s), 6.93 (1H, d,  $J = 7.5$  Hz), 7.16 (1H, d,  $J = 7.5$  Hz), 7.21–7.35 (3H, m), 7.46–7.62 (3H, m), 7.76 (2H, d,  $J = 7.5$  Hz); MS (FAB)  $m/z$  581 ( $M + 1$ ). Anal. ( $C_{29}H_{26}Cl_2N_4O_3$ ) C, H, N.

**4-[[2,6-Dichloro-3-[N-methyl-N-[(E)-4-(N-methylcarbamoyl)cinnamamidoacetyl]amino]benzyl]oxy]-1,2-dimethyl-1H-benzimidazole (52a).** Following a procedure similar to method A, the title compound was obtained in 85.7% yield from **9** and **50a** as a colorless amorphous solid;  $^1H$  NMR ( $CDCl_3$ )  $\delta$  2.58 (3H, s), 3.02 (3H, d,  $J = 5$  Hz), 3.28 (3H, s), 3.61–3.72 (4H, m), 3.93

(1H, dd,  $J = 17, 5$  Hz), 5.52 (1H, d,  $J = 10$  Hz), 5.58 (1H, d,  $J = 10$  Hz), 6.20 (1H, br d,  $J = 5$  Hz), 6.52 (1H, d,  $J = 15$  Hz), 6.70 (1H, br s), 6.88 (1H, d,  $J = 7.5$  Hz), 6.98 (1H, d,  $J = 7.5$  Hz), 7.22 (1H, t,  $J = 7.5$  Hz), 7.30 (1H, d,  $J = 8$  Hz), 7.48 (1H, d,  $J = 8$  Hz), 7.51–7.62 (3H, m), 7.77 (2H, d,  $J = 7.5$  Hz); MS (FAB)  $m/z$  594 ( $M + 1$ ). Anal. ( $C_{30}H_{29}Cl_2N_5O_4$ ) C, H, N.

**4-[[2,6-Dichloro-3-[*N*-methyl-*N*-[(*E*)-4-(*N*-methylcarbamoyl)cinnamamidoacetyl]amino]benzyl]oxy]-1-ethyl-2-methyl-1*H*-benzimidazole (52b).** Following a procedure similar to method A, the title compound was obtained in 81.2% yield from **18a** and **50a** as a colorless amorphous solid;  $^1H$  NMR ( $CDCl_3$ )  $\delta$  1.40 (3H, t,  $J = 7$  Hz), 2.58 (3H, s), 3.02 (3H, d,  $J = 5$  Hz), 3.28 (3H, s), 3.68 (1H, dd,  $J = 17, 4$  Hz), 3.94 (1H, dd,  $J = 17, 5$  Hz), 4.15 (2H, q,  $J = 7$  Hz), 5.52 (1H, d,  $J = 10$  Hz), 5.58 (1H, d,  $J = 10$  Hz), 6.20 (1H, br d,  $J = 5$  Hz), 6.52 (1H, d,  $J = 15$  Hz), 6.70 (1H, br t,  $J = 5$  Hz), 6.86 (1H, d,  $J = 7.5$  Hz), 6.99 (1H, d,  $J = 7.5$  Hz), 7.22 (1H, t,  $J = 7.5$  Hz), 7.31 (1H, d,  $J = 8$  Hz), 7.48 (1H, d,  $J = 8$  Hz), 7.51–7.62 (3H, m), 7.76 (2H, d,  $J = 7.5$  Hz); MS (FAB)  $m/z$  608 ( $M + 1$ ). Anal. ( $C_{31}H_{31}Cl_2N_5O_4$ ) C, H, N.

**4-[[2,6-Dichloro-3-[*N*-methyl-*N*-[(*E*)-4-(*N*-methylcarbamoyl)cinnamamidoacetyl]amino]benzyl]oxy]-2-ethyl-1-methyl-1*H*-benzimidazole (52c).** Following a procedure similar to method A, the title compound was obtained in 74.8% yield from **18b** and **50a** as a colorless amorphous solid;  $^1H$  NMR ( $CDCl_3$ )  $\delta$  1.36 (3H, t,  $J = 7$  Hz), 2.93 (2H, q,  $J = 7$  Hz), 3.02 (3H, d,  $J = 4$  Hz), 3.27 (3H, s), 3.66 (1H, dd,  $J = 17, 4$  Hz), 3.73 (3H, s), 3.93 (1H, dd,  $J = 17, 5$  Hz), 5.53–5.64 (2H, m), 6.17 (1H, br s), 6.52 (1H, d,  $J = 15$  Hz), 6.68 (1H, br t,  $J = 5$  Hz), 6.86 (1H, d,  $J = 8$  Hz), 6.98 (1H, d,  $J = 8$  Hz), 7.21 (1H, t,  $J = 8$  Hz), 7.30 (1H, d,  $J = 8$  Hz), 7.46 (1H, d,  $J = 8$  Hz), 7.54 (2H, d,  $J = 8$  Hz), 7.59 (1H, d,  $J = 15$  Hz), 7.75 (2H, d,  $J = 8$  Hz); MS (FAB)  $m/z$  608 ( $M + 1$ ). Anal. ( $C_{31}H_{31}Cl_2N_5O_4$ ) C, H, N.

**4-[[2,6-Dichloro-3-[*N*-methyl-*N*-[(*E*)-4-(*N*-methylcarbamoyl)cinnamamidoacetyl]amino]benzyl]oxy]-2-ethyl-1-methyl-**

**1H-benzimidazole Hydrochloride (64c).** Following a procedure similar to method B, the title compound was obtained in 92.8% yield from **64c** as a colorless amorphous solid;  $^1\text{H}$  NMR ( $\text{DMSO}-d_6$ )  $\delta$  1.27–1.37 (3H, m), 2.78 (3H, d,  $J = 5$  Hz), 3.12 (2H, q,  $J = 7.5$  Hz), 3.15 (3H, s), 3.84 (1H, dd,  $J = 17, 4$  Hz), 3.95 (3H, s), 4.15 (1H, dd,  $J = 17, 5$  Hz), 5.53 (1H, d,  $J = 10$  Hz), 5.60 (1H, d,  $J = 8$  Hz), 6.86–6.92 (1H, m), 7.37–7.49 (2H, m), 7.49–7.78 (4H, m), 7.78–7.91 (4H, m), 8.38 (1H, br t,  $J = 5$  Hz), 8.52 (1H, br s). Anal. ( $\text{C}_{31}\text{H}_{31}\text{Cl}_2\text{N}_5\text{O}_4 \cdot \text{HCl}$ ) C, H, N.

**4-[[2,6-Dichloro-3-[N-methyl-N-[(E)-4-(N-methylcarbamoyl)cinnamamidoacetyl]amino]benzyl]oxy]-1-methyl-2-phenyl-1H-benzimidazole (52d).** Following a procedure similar to method A, the title compound was obtained in 78.2% yield from **18e** and **50a** as a colorless amorphous solid;  $^1\text{H}$  NMR ( $\text{CDCl}_3$ )  $\delta$  2.98 (3H, d,  $J = 5$  Hz), 3.25 (3H, s), 3.66 (1H, dd,  $J = 17, 5$  Hz), 3.82 (3H, s), 3.93 (1H, dd,  $J = 17, 5$  Hz), 5.66 (2H, s), 6.24 (1H, br q,  $J = 5$  Hz), 6.51 (1H, d,  $J = 15$  Hz), 6.71 (1H, br t,  $J = 5$  Hz), 6.93 (1H, d,  $J = 8$  Hz), 7.08 (1H, d,  $J = 8$  Hz), 7.25–7.34 (2H, m), 7.43–7.61 (7H, m), 7.68–7.79 (4H, m). Anal. ( $\text{C}_{35}\text{H}_{31}\text{Cl}_2\text{N}_5\text{O}_4$ ) C, H, N.

**4-[[2,6-Dichloro-3-[N-methyl-N-[(E)-4-(N-methylcarbamoyl)cinnamamidoacetyl]amino]benzyl]oxy]-2-methoxy-1-methyl-1H-benzimidazole (52e).** Following a procedure similar to method A, the title compound was obtained in 78.2% yield from **21a** and **50a** as colorless crystals after crystallization from ether: mp 244–249 °C;  $^1\text{H}$  NMR ( $\text{CDCl}_3$ )  $\delta$  3.02 (3H, d,  $J = 5$  Hz), 3.27 (3H, s), 3.53 (3H, s), 3.67 (1H, dd,  $J = 17, 5$  Hz), 3.93 (1H, dd,  $J = 17, 5$  Hz), 5.64 (2H, s), 6.29 (1H, br q,  $J = 5$  Hz), 6.53 (1H, d,  $J = 15$  Hz), 6.70 (1H, br t,  $J = 5$  Hz), 6.82–6.90 (2H, m), 7.11 (1H, t,  $J = 8$  Hz), 7.30 (1H, d,  $J = 8$  Hz), 7.46 (1H, d,  $J = 8$  Hz), 7.53 (2H, d,  $J = 8$  Hz), 7.58 (1H, d,  $J = 15$  Hz), 7.76 (2H, d,  $J = 8$  Hz); MS (ESI)  $m/z$  610 ( $M + 1$ ). Anal. ( $\text{C}_{30}\text{H}_{29}\text{Cl}_2\text{N}_5\text{O}_5$ ) C, H, N.

**4-[[2,6-Dimethyl-3-[N-methyl-N-[(E)-4-(N-methylcarbamoyl)cinnamamidoacetyl]amino]benzyl]oxy]-2-methoxy-1-**

**methyl-1*H*-benzimidazole (52f).** Following a procedure similar to method A, the title compound was obtained in 72.9% yield from **21a** and **50b** as a colorless amorphous solid:  $^1\text{H}$  NMR ( $\text{CDCl}_3$ )  $\delta$  2.35 (3H, s), 2.51 (3H, s), 3.03 (3H, d,  $J = 5$  Hz), 3.25 (3H, s), 3.55 (3H, s), 3.64 (1H, dd,  $J = 17, 5$  Hz), 3.88 (1H, dd,  $J = 17, 5$  Hz), 4.19 (3H, s), 5.41 (2H, s), 6.15 (1H, br s), 6.53 (1H, d,  $J = 15$  Hz), 6.72 (1H, br s), 6.81–6.89 (2H, m), 7.02–7.18 (3H, m), 7.50–7.62 (3H, m), 7.75 (2H, d,  $J = 8$  Hz); MS (ESI)  $m/z$  570 ( $M + 1$ ). Anal. ( $\text{C}_{32}\text{H}_{35}\text{N}_5\text{O}_5$ ) C, H, N.

**4-[[2,6-Dimethyl-3-[*N*-methyl-*N*-(*E*)-4-(*N*-methylcarbamoyl)cinnamamidoacetyl]amino]benzyl]oxy]-2-ethoxy-1-methyl-1*H*-benzimidazole (52g).** Following a procedure similar to method A, the title compound was obtained in 70.1% yield from **21b** and **50b** as colorless crystals after crystallization from MeCN: mp 226–231 °C;  $^1\text{H}$  NMR ( $\text{CDCl}_3$ )  $\delta$  1.43 (3H, t,  $J = 7$  Hz), 2.32 (3H, s), 2.50 (3H, s), 3.00 (3H, d,  $J = 5$  Hz), 3.24 (3H, s), 3.53 (3H, s), 3.61 (1H, dd,  $J = 17, 5$  Hz), 3.87 (1H, dd,  $J = 17, 5$  Hz), 4.59 (2H, q,  $J = 7$  Hz), 5.41 (2H, s), 6.23 (1H, q,  $J = 5$  Hz), 6.52 (1H, d,  $J = 15$  Hz), 6.72 (1H, br t,  $J = 5$  Hz), 6.80–6.89 (2H, m), 7.02–7.17 (3H, m), 7.52 (2H, d,  $J = 8$  Hz), 7.56 (1H, d,  $J = 15$  Hz), 7.74 (2H, d,  $J = 8$  Hz); MS (ESI)  $m/z$  584 ( $M + 1$ ). Anal. ( $\text{C}_{33}\text{H}_{37}\text{N}_5\text{O}_5$ ) C, H, N.

**4-[[2,6-Dimethyl-3-[*N*-methyl-*N*-(*E*)-4-(*N*-methylcarbamoyl)cinnamamidoacetyl]amino]benzyl]oxy]-2-methoxymethyl-1-methyl-1*H*-benzimidazole (52h).** Following a procedure similar to method A, the title compound was obtained in 77.8% yield from **18c** and **50b** as colorless crystals after crystallization from MeCN: mp 232–235 °C;  $^1\text{H}$  NMR ( $\text{DMSO}-d_6$ )  $\delta$  2.28 (3H, s), 2.40 (3H, s), 2.79 (3H, d,  $J = 5$  Hz), 3.10 (3H, s), 3.28 (3H, s), 3.49 (1H, dd,  $J = 17, 5$  Hz), 3.67 (1H, dd,  $J = 17, 5$  Hz), 3.78 (3H, s), 4.63 (2H, s), 5.34 (2H, s), 6.87 (1H, d,  $J = 15$  Hz), 6.92 (1H, d,  $J = 8$  Hz), 7.13–7.33 (4H, m), 7.42 (1H, d,  $J = 15$  Hz), 7.62 (2H, d,  $J = 8$  Hz), 7.84 (2H, d,  $J = 8$  Hz), 8.26 (1H, br t,  $J = 5$  Hz), 8.48 (1H, br q,  $J = 5$  Hz); MS (ESI)  $m/z$  584 ( $M + 1$ ). Anal. ( $\text{C}_{32}\text{H}_{35}\text{N}_5\text{O}_5$ ) C, H, N.

**4-[[2,6-Dimethyl-3-[N-methyl-N-[(E)-4-(N-methylcarbamoyl)cinnamamidoacetyl]amino]benzyl]oxy]-2-ethoxycarbonylmethyl-1-methyl-1H-benzimidazole (52i).** Following a procedure similar to method A, the title compound was obtained in 73.5% yield from **18d** and **50b** as colorless crystals after crystallization from diethyl ether–MeCN: mp 132–140 °C; <sup>1</sup>H NMR (DMSO-*d*<sub>6</sub>) δ 1.19 (3H, t, *J* = 8 Hz), 2.29 (3H, s), 2.40 (3H, s), 2.79 (3H, d, *J* = 5 Hz), 3.12 (3H, s), 3.49 (1H, dd, *J* = 17, 5 Hz), 3.67 (1H, dd, *J* = 17, 5 Hz), 3.72 (3H, s), 4.09 (2H, s), 4.11 (2H, q, *J* = 8 Hz), 5.33 (2H, s), 6.89 (1H, d, *J* = 16 Hz), 6.92 (1H, d, *J* = 8 Hz), 7.13–7.33 (4H, m), 7.42 (1H, d, *J* = 16 Hz), 7.63 (2H, d, *J* = 8 Hz), 7.84 (2H, d, *J* = 8 Hz), 8.25 (1H, br t, *J* = 5 Hz), 8.48 (1H, br q, *J* = 5 Hz); MS (ESI) *m/z* 626 (*M* + 1). Anal. (C<sub>35</sub>H<sub>39</sub>N<sub>5</sub>O<sub>6</sub>) C, H, N.

**2-Acethyl-4-[[2,6-dimethyl-3-[N-methyl-N-[(E)-4-(N-methylcarbamoyl)cinnamamidoacetyl]amino]benzyl]oxy]-1-methyl-1H-benzimidazole (52j).** Following a procedure similar to method A, the title compound was obtained in 74.3% yield from **21f** and **50b** as colorless crystals after crystallization from MeCN: mp 234–236 °C; <sup>1</sup>H NMR (DMSO-*d*<sub>6</sub>) δ 2.32 (3H, s), 2.45 (3H, s), 2.67 (3H, s), 2.79 (3H, d, *J* = 5 Hz), 3.12 (3H, s), 3.50 (1H, dd, *J* = 17, 5 Hz), 3.67 (1H, dd, *J* = 17, 5 Hz), 4.04 (3H, s), 5.38 (2H, s), 6.88 (1H, d, *J* = 16 Hz), 7.08 (1H, d, *J* = 8 Hz), 7.25–7.47 (5H, m), 7.63 (2H, d, *J* = 8 Hz), 7.85 (2H, d, *J* = 8 Hz), 8.25 (1H, br t, *J* = 5 Hz), 8.47 (1H, br q, *J* = 5 Hz); MS (ESI) *m/z* 582 (*M* + 1). Anal. (C<sub>33</sub>H<sub>35</sub>N<sub>5</sub>O<sub>5</sub>) C, H, N.

**4-[[2,6-Dimethyl-3-[N-methyl-N-[(E)-4-(N-methylcarbamoyl)cinnamamidoacetyl]amino]benzyl]oxy]-1-methyl-2-methylamino-1H-benzimidazole (52l).** Following a procedure similar to method A, the title compound was obtained in 41.3% yield from **21c** and **50b** as a colorless amorphous solid: <sup>1</sup>H NMR (CDCl<sub>3</sub>–CD<sub>3</sub>OD) δ 2.29 (3H, s), 2.40 (3H, s), 2.98 (3H, s), 3.03 (3H, s), 3.22 (3H, s), 3.53 (3H, br s), 3.66 (1H, d, *J* = 17 Hz), 3.87 (1H, d, *J* = 17 Hz), 5.27 (2H, s), 6.57 (1H, d, *J* = 15 Hz), 6.80–6.89 (2H, m), 7.06–7.16 (3H, m),

7.50–7.61 (3H, m), 7.75 (2H, d,  $J = 8$  Hz); MS (ESI)  $m/z$  569 ( $M + 1$ ). Anal.

( $C_{32}H_{36}N_6O_4$ ) C, H, N.

**4-[[2,6-Dimethyl-3-[*N*-methyl-*N*-[(*E*)-4-(*N*-methylcarbamoyl)cinnamamidoacetyl]amino]benzyl]oxy]-2-dimethylamino-1-methyl-1*H*-benzimidazole (52m).** Following a procedure similar to method A, the title compound was obtained in 93.6% yield from **21d** and **50b** as a colorless amorphous solid:  $^1\text{H}$  NMR ( $\text{CDCl}_3$ )  $\delta$  2.34 (3H, s), 2.50 (3H, s), 2.95 (6H, s), 3.01 (3H, d,  $J = 5$  Hz), 3.23 (3H, s), 3.58–3.68 (4H, m), 3.88 (1H, dd,  $J = 17, 5$  Hz), 5.42 (2H, s), 6.20 (1H, br d,  $J = 5$  Hz), 6.52 (1H, t,  $J = 15$  Hz), 6.72 (1H, br t,  $J = 5$  Hz), 6.80–6.90 (2H, m), 7.01–7.17 (3H, m), 7.50–7.60 (2H, m), 7.75 (2H, d,  $J = 8$  Hz); MS (ESI)  $m/z$  583 ( $M + 1$ ). Anal. ( $C_{33}H_{38}N_6O_4$ ) C, H, N.

**4-[[2,6-Dichloro-3-[*N*-methyl-*N*-[(*E*)-4-(*N*-methylcarbamoyl)cinnamamidoacetyl]amino]benzyl]oxy]-2,3-dimethylbenzo[*b*]furan (53).** Following a procedure similar to method A, the title compound was obtained in 86.5% yield from 2,3-dimethylbenzo[*b*]furan-7-ol and **50a** as colorless crystals after crystallization from MeCN: mp 237–238 °C;  $^1\text{H}$  NMR ( $\text{DMSO}-d_6$ )  $\delta$  2.10 (3H, s), 2.32 (3H, s), 2.77 (3H, d,  $J = 5$  Hz), 3.13 (3H, s), 3.50 (1H, dd,  $J = 17, 5$  Hz), 3.76 (1H, dd,  $J = 17, 4$  Hz), 5.43 (2H, s), 6.85 (1H, t,  $J = 15$  Hz), 7.01 (1H, d,  $J = 8$  Hz), 7.05–7.18 (2H, m), 7.40 (1H, d,  $J = 15$  Hz), 7.63 (2H, d,  $J = 8$  Hz), 7.73 (2H, d,  $J = 8$  Hz), 7.77 (1H, d,  $J = 8$  Hz), 7.85 (2H, d,  $J = 8$  Hz), 8.32 (1H, br t,  $J = 5$  Hz), 8.49 (1H, br q,  $J = 5$  Hz). Anal. ( $C_{31}H_{29}Cl_2N_3O_5$ ) C, H, N.

**8-[[2,6-Dimethyl-3-[*N*-methyl-*N*-[(*E*)-4-(*N*-methylcarbamoyl)cinnamamidoacetyl]amino]benzyl]oxy]-2-methylquinoline Hydrochloride (54b).** Following a procedure similar to method B, the title compound was obtained in 94.8% yield from **62b** as a colorless amorphous solid:  $^1\text{H}$  NMR ( $\text{CDCl}_3\text{--CD}_3\text{OD}$ )  $\delta$  2.30 (3H, s), 2.48 (3H, s), 2.99 (3H, s), 3.12 (3H, br s), 3.28 (3H, s), 3.80 (1H, d,  $J = 17$  Hz), 3.88 (1H, d,  $J = 17$  Hz), 5.39 (1H, d,  $J = 10$  Hz), 5.49 (1H, d,  $J = 10$  Hz), 6.61 (1H, d,  $J = 15$  Hz), 7.19–7.28 (2H, m), 7.40–

7.53 (3H, m), 7.66 (1H, d,  $J = 8$  Hz), 7.75–7.97 (5H, m), 8.90 (1H, d,  $J = 8$  Hz).

Anal. ( $C_{33}H_{34}N_4O_4 \cdot HCl$ ) C, H, N.

**8-[[2,6-Dichloro-3-[*N*-methyl-*N*-[(*E*)-3-[6-(*N*-methylcarbamoyl)pyridin-3-yl]acryloylglycyl]amino]benzyl]oxy]-2-methylquinoline Dihydrochloride (54c).** Following a procedure similar to method B, the title compound was obtained in

90.3% yield from **62c** as a colorless amorphous solid:  $^1H$  NMR ( $CDCl_3$ – $CD_3OD$ )  $\delta$  3.00 (3H, s), 3.13 (3H, s), 3.25 (3H, s), 3.85 (3H, d,  $J = 16$  Hz), 4.21 (1H, d,  $J = 16$  Hz), 5.53 (1H, d,  $J = 10$  Hz), 5.64 (1H, d,  $J = 10$  Hz), 6.85 (1H, d,  $J = 16$  Hz), 7.41–7.62 (4H, m), 7.73 (1H, d,  $J = 8$  Hz), 7.78–7.88 (2H, m), 8.33 (2H, br s), 8.80 (1H, d,  $J = 8$  Hz), 9.00 (1H, br s). Anal. ( $C_{30}H_{27}Cl_2N_5O_4 \cdot 2HCl$ ) C, H, N.

**8-[[2,6-Dimethyl -3-[*N*-methyl-*N*-[(*E*)-3-[6-(*N*-methylcarbamoyl)pyridin-3-yl]acryloylglycyl]amino]benzyl]oxy]-2-methylquinoline Dihydrochloride (54d).** Following a procedure similar to method B, the title compound was obtained in

81.3% yield **62d** as a colorless amorphous solid:  $^1H$  NMR ( $DMSO-d_6$ )  $\delta$  2.29 (3H, s), 2.48 (3H, s), 2.82 (3H, d,  $J = 5$  Hz), 2.92 (3H, s), 3.13 (3H, s), 3.55 (1H, dd,  $J = 17$ , 4 Hz), 3.75 (1H, dd,  $J = 17$ , 5 Hz), 5.41–5.54 (2H, m), 7.05 (1H, d,  $J = 15$  Hz), 7.31 (1H, d,  $J = 8$  Hz), 7.39 (1H, d,  $J = 8$  Hz), 7.49 (1H, d,  $J = 15$  Hz), 7.81–8.00 (4H, m), 8.05 (1H, d,  $J = 8$  Hz), 8.15 (1H, dd,  $J = 8$ , 2 Hz), 8.35 (1H, br t,  $J = 5$  Hz), 8.74–8.84 (2H, m), 8.98 (1H, br s). Anal. ( $C_{32}H_{33}N_5O_4 \cdot 2HCl$ ) C, H, N.

**5-[[2,6-Dichloro-3-[*N*-methyl-*N*-[(*E*)-4-(*N*-methylcarbamoyl)cinnamamidoacetyl]amino]benzyl]oxy]-2-methylisoquinoline (55).** Following a procedure similar to method A, the title compound was obtained in 41.3% yield from **27** and **50a** as a colorless amorphous solid:

$^1H$  NMR ( $CDCl_3$ )  $\delta$  2.69 (3H, s), 3.02 (3H, d,  $J = 5$  Hz), 3.31 (3H, s), 3.70 (1H, dd,  $J = 17$ , 4 Hz), 3.99 (1H, dd,  $J = 17$ , 5 Hz), 5.47 (1H, d,  $J = 10$  Hz), 5.51 (1H, d,  $J = 10$  Hz), 6.16 (1H, br d,  $J = 5$  Hz), 6.53 (1H, d,  $J = 15$  Hz), 6.69 (1H, br t,  $J = 4$  Hz), 7.19 (1H, d,  $J = 7.5$  Hz), 7.40 (1H, d,  $J = 8$  Hz), 7.45–7.64 (6H), 7.72–7.80 (3H), 9.15 (1H, s); MS (FAB)  $m/z$  591 ( $M + 1$ ). Anal. ( $C_{31}H_{28}Cl_2N_4O_4$ ) C, H, N.

**8-[[2,6-Dichloro-3-[N-methyl-N-[(E)-4-(N-methylcarbamoyl)cinnamamidoacetyl]amino]benzyl]oxy]-2-methylquinazoline (56).** Following a procedure similar to method A, the title compound was obtained in 82.0% yield from **32** and **50a** as a colorless amorphous solid:  $^1\text{H}$  NMR ( $\text{CDCl}_3$ )  $\delta$  2.90 (3H, s), 3.02 (3H, d,  $J = 5$  Hz), 3.28 (3H, s), 3.67 (1H, dd,  $J = 18, 4$  Hz), 3.93 (1H, dd,  $J = 18, 4$  Hz), 5.63 (2H, s), 6.20 (1H, br d,  $J = 5$  Hz), 6.52 (1H, d,  $J = 16$  Hz), 6.68 (1H, br t,  $J = 4$  Hz), 7.33 (1H, d,  $J = 7.5$  Hz), 7.41–7.62 (7H), 7.77 (2H, d,  $J = 8$  Hz), 9.31 (1H, s); MS (FAB)  $m/z$  592 ( $M + 1$ ). Anal. ( $\text{C}_{30}\text{H}_{27}\text{Cl}_2\text{N}_5\text{O}_4$ ) C, H, N.

**8-[[2,6-Dichloro-3-[N-methyl-N-[(E)-4-(N-methylcarbamoyl)cinnamamidoacetyl]amino]benzyl]oxy]-2-methylquinoxaline (63a).** Following a procedure similar to method A, the title compound was obtained in 85.8% yield from **34a** and **50a** as a colorless amorphous solid:  $^1\text{H}$  NMR ( $\text{CDCl}_3$ )  $\delta$  2.77 (3H, s), 3.02 (3H, d,  $J = 5$  Hz), 3.28 (3H, s), 3.67 (1H, dd,  $J = 17, 4$  Hz), 3.94 (1H, dd,  $J = 17, 4$  Hz), 5.62 (2H, s), 6.20 (1H, br d,  $J = 5$  Hz), 6.53 (1H, d,  $J = 16$  Hz), 6.69 (1H, br t,  $J = 4$  Hz), 7.29–7.38 (2H, m), 7.49–7.80 (8H, m), 8.74 (1H, s); MS (FAB)  $m/z$  592 ( $M + 1$ ). Anal. ( $\text{C}_{30}\text{H}_{27}\text{Cl}_2\text{N}_5\text{O}_4$ ) C, H, N.

**8-[[2,6-Dichloro-3-[N-methyl-N-[(E)-4-(N-methylcarbamoyl)cinnamamidoacetyl]amino]benzyl]oxy]-2-methylquinoxaline Hydrochloride (57a).** Following a procedure similar to method B, the title compound was obtained in 85.3% yield from **63a** as a colorless amorphous solid:  $^1\text{H}$  NMR ( $\text{CDCl}_3\text{--CD}_3\text{OD}$ )  $\delta$  2.89 (3H, s), 2.98 (3H, s), 3.29 (3H, s), 3.19 (1H, d,  $J = 17$  Hz), 4.00 (1H, d,  $J = 17$  Hz), 5.65 (2H, s), 6.62 (1H, d,  $J = 15$  Hz), 7.44–7.63 (6H, m), 7.75–7.91 (4H, m), 8.92 (1H, s). Anal. ( $\text{C}_{30}\text{H}_{27}\text{Cl}_2\text{N}_5\text{O}_4 \cdot \text{HCl}$ ) C, H, N.

**8-[[2,6-Dichloro-3-[N-methyl-N-[(E)-4-(N-methylcarbamoyl)cinnamamidoacetyl]amino]benzyl]oxy]-3-methylquinoxaline (58).** Following a procedure similar to method A, the title compound was obtained in 88.9% yield from **34b** and **50a** as a colorless amorphous

solid:  $^1\text{H}$  NMR ( $\text{CDCl}_3$ )  $\delta$  2.78 (3H, s), 3.02 (3H, d,  $J = 5$  Hz), 3.28 (3H, s), 3.69 (1H, dd,  $J = 17, 4$  Hz), 3.93 (1H, dd,  $J = 17, 5$  Hz), 5.57 (2H, s), 6.68 (1H, br d,  $J = 5$  Hz), 6.52 (1H, d,  $J = 15$  Hz), 6.68 (1H, br t,  $J = 4$  Hz), 7.27 (1H, overlapped with  $\text{CDCl}_3$ ), 7.35 (1H, d,  $J = 9$  Hz), 7.49–7.79 (8H, m), 8.73 (1H, s); MS (FAB)  $m/z$  592 ( $M + 1$ ). Anal. ( $\text{C}_{30}\text{H}_{27}\text{Cl}_2\text{N}_5\text{O}_4$ ) C, H, N.

**7-[[2,6-Dichloro-3-[N-methyl-N-[(E)-4-(N-methylcarbamoyl)cinnamamidoacetyl]amino]benzyl]oxy]-2-methylquinoline (59).**

Following a procedure similar to method A, the title compound was obtained in 79.3% yield from **38** and **50a** as a colorless amorphous solid:  $^1\text{H}$  NMR ( $\text{CDCl}_3$ )  $\delta$  2.76 (3H, s), 3.03 (3H, d,  $J = 5$  Hz), 3.29 (3H, s), 3.69 (1H, dd,  $J = 17, 4$  Hz), 4.00 (1H, dd,  $J = 17, 5$  Hz), 5.40 (1H, d,  $J = 10$  Hz), 5.48 (1H, d,  $J = 10$  Hz), 6.68 (1H, br d,  $J = 5$  Hz), 6.53 (1H, d,  $J = 15$  Hz), 6.70 (1H, br t,  $J = 4$  Hz), 7.20 (2H, d,  $J = 8$  Hz), 7.37 (1H, d,  $J = 8$  Hz), 7.50–7.63 (5H, m), 7.69 (1H, d,  $J = 8$  Hz), 7.77 (2H, d,  $J = 8$  Hz), 8.00 (1H, d,  $J = 8$  Hz); MS (FAB)  $m/z$  591 ( $M + 1$ ). Anal. ( $\text{C}_{30}\text{H}_{27}\text{Cl}_2\text{N}_5\text{O}_4$ ) C, H, N.

**2-[[[2,6-Dichloro-3-[N-methyl-N-[(E)-4-(N-methylcarbamoyl)cinnamamidoacetyl]amino]benzyl]oxy]methyl]-6-methylpyridine (60).**

Following a procedure similar to method A, the title compound was obtained in 47.8% yield from 2-hydroxymethyl-2-methylpyridine and **50a** as a colorless amorphous solid:  $^1\text{H}$  NMR ( $\text{CDCl}_3$ )  $\delta$  2.02 (6H, s), 3.02 (3H, d,  $J = 5$  Hz), 3.23 (3H, s), 3.59 (1H, d,  $J = 17, 4$  Hz), 3.89 (1H, dd,  $J = 17, 5$  Hz), 5.03 (2H, s), 5.82 (2H, s), 6.15 (1H, br d,  $J = 5$  Hz), 6.51 (1H, d,  $J = 15$  Hz), 6.62 (1H, br t,  $J = 5$  Hz), 7.30 (1H, d,  $J = 8$  Hz), 7.35–7.48 (2H, m), 7.51–7.62 (4H, m), 7.76 (2H, d,  $J = 8$  Hz), 8.32 (1H, d,  $J = 5$  Hz); MS (FAB)  $m/z$  555 ( $M + 1$ ). Anal. ( $\text{C}_{28}\text{H}_{28}\text{Cl}_2\text{N}_4\text{O}_4$ ) C, H, N.

**3-[[2,6-Dichloro-3-[N-methyl-N-[(E)-4-(N-methylcarbamoyl)cinnamamidoacetyl]amino]benzyl]oxy]-2-(2,5-**

**dimethylpyrrolyl)pyridine (61).** Following a procedure similar to method A, the

title compound was obtained in 53.9% yield from 3-hydroxy-2-(2,5-dimethylpyrrolyl)pyridine and **50a** as a colorless amorphous solid:  $^1\text{H}$  NMR ( $\text{CDCl}_3$ )  $\delta$  2.02 (6H, s), 3.02 (3H, d,  $J = 5$  Hz), 3.23 (3H, s), 3.59 (1H, d,  $J = 17$ , 4 Hz), 3.89 (1H, dd,  $J = 17$ , 5 Hz), 5.03 (2H, s), 5.82 (2H, s), 6.15 (1H, br d,  $J = 5$  Hz), 6.51 (1H, d,  $J = 15$  Hz), 6.62 (1H, br t,  $J = 5$  Hz), 7.30 (1H, d,  $J = 8$  Hz), 7.35–7.48 (2H, m), 7.51–7.62 (4H, m), 7.76 (2H, d,  $J = 8$  Hz), 8.32 (1H, d,  $J = 5$  Hz); MS (FAB)  $m/z$  620 ( $M + 1$ ). Anal. ( $\text{C}_{32}\text{H}_{31}\text{Cl}_2\text{N}_5\text{O}_4$ ) C, H, N.

**8-[[2,6-Dimethyl-3-[N-methyl-N-[(E)-4-(N-methylcarbamoyl)cinnamamidoacetyl]amino]benzyl]oxy]-2-methylquinoline (62b).** Following a procedure similar to method A, the title compound was obtained in 74.8% yield from 8-hydroxy-2-methylquinoline and **50b** as a colorless amorphous solid:  $^1\text{H}$  NMR ( $\text{CDCl}_3$ )  $\delta$  2.37 (3H, s), 2.52 (3H, s), 2.72 (3H, s), 3.00 (3H, d,  $J = 5$  Hz), 3.26 (3H, s), 3.63 (1H, dd,  $J = 17$ , 4 Hz), 3.88 (1H, dd,  $J = 17$ , 5 Hz), 5.35 (2H, s), 6.22 (1H, br d,  $J = 5$  Hz), 6.52 (1H, d,  $J = 15$  Hz), 6.75 (1H, br s), 7.08 (1H, d,  $J = 8$  Hz), 7.18 (1H, d,  $J = 8$  Hz), 7.22–7.32 (2H, m), 7.41–7.61 (5H, m), 7.73 (2H, d,  $J = 8$  Hz), 8.04 (1H, d,  $J = 8$  Hz); MS (FAB)  $m/z$  551 ( $M + 1$ ). Anal. ( $\text{C}_{33}\text{H}_{34}\text{N}_4\text{O}_4$ ) C, H, N.

**8-[[2,6-Dimethyl-3-[N-methyl-N-[(E)-3-[6-(N-methylcarbamoyl)pyridin-3-yl]acryloylglycyl]amino]benzyl]oxy]-2-methylquinoline (62d).** Following a procedure similar to method C, the title compound was obtained in 80.2% yield **83c** and methylamine hydrochloride as a colorless amorphous solid:  $^1\text{H}$  NMR ( $\text{CDCl}_3$ )  $\delta$  2.37 (3H, s), 2.53 (3H, s), 2.74 (3H, s), 3.05 (3H, d,  $J = 5$  Hz), 3.27 (3H, s), 3.64 (1H, dd,  $J = 17$ , 4 Hz), 3.90 (1H, dd,  $J = 17$ , 5 Hz), 5.36 (2H, s), 6.61 (1H, d,  $J = 15$  Hz), 6.77 (1H, br t,  $J = 5$  Hz), 7.07 (1H, d,  $J = 8$  Hz), 7.18 (1H, d,  $J = 8$  Hz), 7.22–7.33 (2H, m), 7.40–7.49 (5H, m), 7.60 (2H, d,  $J = 15$  Hz), 7.91–7.80 (2H, m), 8.03 (1H, d,  $J = 8$  Hz), 8.20 (1H, d,  $J = 8$  Hz), 8.63 (1H, d,  $J = 2$  Hz); MS (FAB)  $m/z$  552 ( $M + 1$ ). Anal. ( $\text{C}_{32}\text{H}_{33}\text{N}_5\text{O}_4$ ) C, H, N.

**8-[[2,6-Dimethyl-3-[N-methyl-N-[(E)-4-(N-methylcarbamoyl)cinnamamidoacetyl]amino]benzyl]oxy]-2-methylquinoxaline (63b).** Following a procedure similar to method A, the title compound was obtained in 89.7% yield from **34a** and **50b** as a colorless amorphous solid:  $^1\text{H NMR}$  ( $\text{CDCl}_3$ )  $\delta$  2.34 (3H, s), 2.51 (3H, s), 2.77 (3H, s), 3.02 (3H, d,  $J = 5$  Hz), 3.27 (3H, s), 3.65 (1H, dd,  $J = 17, 4$  Hz), 3.88 (1H, dd,  $J = 17, 5$  Hz), 5.35 (2H, s), 6.17 (1H, br d,  $J = 5$  Hz), 6.53 (1H, d,  $J = 15$  Hz), 6.71 (1H, br t,  $J = 5$  Hz), 7.09 (1H, d,  $J = 8$  Hz), 7.19 (1H, d,  $J = 8$  Hz), 7.30 (1H, d,  $J = 8$  Hz), 7.51–7.61 (3H, m), 7.67 (1H, t,  $J = 8$  Hz), 7.72–7.79 (3H, m), 8.75 (1H, s); MS (ESI)  $m/z$  552 ( $M + 1$ ). Anal. ( $\text{C}_{32}\text{H}_{33}\text{N}_5\text{O}_4$ ) C, H, N.

**8-[[2,6-Dimethyl-3-[N-methyl-N-[(E)-3-[6-(N-methylcarbamoyl)pyridin-3-yl]acryloylglycyl]amino]benzyl]oxy]-2-methylquinoxaline (63c).** Following a procedure similar to method C, the title compound was obtained in 82.0% yield from **79** and methylamine hydrochloride as a colorless amorphous solid:  $^1\text{H NMR}$  ( $\text{CDCl}_3$ )  $\delta$  2.34 (3H, s), 2.52 (3H, s), 2.77 (3H, s), 3.04 (3H, d,  $J = 5$  Hz), 3.28 (3H, s), 3.64 (1H, dd,  $J = 17, 5$  Hz), 3.89 (1H, dd,  $J = 17, 5$  Hz), 5.34 (2H, s), 6.61 (1H, d,  $J = 15$  Hz), 6.76 (1H, br t,  $J = 5$  Hz), 7.10 (1H, d,  $J = 8$  Hz), 7.19 (1H, d,  $J = 8$  Hz), 7.31 (1H, d,  $J = 8$  Hz), 7.60 (1H, d,  $J = 15$  Hz), 7.67 (1H, t,  $J = 8$  Hz), 7.75 (1H, d,  $J = 8$  Hz), 7.91–8.00 (2H, m), 8.20 (1H, d,  $J = 8$  Hz), 8.61 (1H, d,  $J = 2$  Hz), 8.73 (1H, s); MS (ESI)  $m/z$  553 ( $M + 1$ ). Anal. ( $\text{C}_{31}\text{H}_{32}\text{N}_6\text{O}_4$ ) C, H, N.

**2,6-Dichloro-1-hydroxymethyl-3-[N-methyl-N-(N-phthalimidoacetyl)amino]benzene (65a).** Using a similar procedure to that used for **49a**, the title compound was obtained in 63.8% yield from **46a** as colorless crystals after crystallization from MeOH: mp 237–240 °C;  $^1\text{H NMR}$  ( $\text{CDCl}_3$ )  $\delta$  2.24 (1H, t,  $J = 7$  Hz), 3.21 (3H, s), 4.09 (2H, s), 5.04 (1H, d,  $J = 7$  Hz), 7.43 (1H, d,  $J = 8$  Hz), 7.48 (1H, d,  $J = 8$  Hz), 7.67–7.75 (2H, m), 7.80–7.88 (2H, m). Anal. ( $\text{C}_{18}\text{H}_{14}\text{Cl}_2\text{N}_2\text{O}_4$ ) C, H, N.

**2,6-Dimethyl-1-hydroxymethyl-3-[N-methyl-N-(N-phthalimidoacetyl)amino]benzene (65b).** Using a similar procedure to that used for **49a**, the title compound was obtained in 65.4% yield from **46a** as colorless crystals after crystallization from AcOEt: mp 241–243 °C; <sup>1</sup>H NMR (CDCl<sub>3</sub>) δ 2.47 (3H, s), 2.48 (3H, s), 3.20 (3H, s), 3.81 (1H, d, *J* = 17 Hz), 4.18 (1H, d, *J* = 17 Hz), 4.83 (2H, s), 7.14 (1H, d, *J* = 8 Hz), 7.19 (1H, d, *J* = 8 Hz), 7.68–7.75 (2H, m), 7.80–7.88 (2H, m); MS (ESI) *m/z* 353 (*M* + 1). Anal. (C<sub>20</sub>H<sub>20</sub>N<sub>2</sub>O<sub>4</sub>) C, H, N.

**4-[[2,6-Dichloro-3-[N-methyl-N-(N-phthalimidoacetyl)amino]benzyl]oxy]-2-methoxy-1-methyl-1H-benzimidazole (66).** Using a similar procedure to that used for **68a**, the title compound was obtained in 67.9% yield from **65a** and **21a** as colorless crystals after crystallization from MeCN: mp 199–201 °C; <sup>1</sup>H NMR (CDCl<sub>3</sub>) δ 3.24 (3H, s), 3.53 (3H, s), 4.10 (2H, s), 4.20 (3H, s), 5.63–5.74 (2H, m), 6.80–6.88 (2H, m), 7.10 (1H, t, *J* = 8 Hz), 7.43–7.55 (2H, m), 7.67–7.76 (2H, m), 7.80–7.90 (2H, m); MS (ESI) *m/z* 553 (*M* + 1). Anal. (C<sub>27</sub>H<sub>22</sub>Cl<sub>2</sub>N<sub>4</sub>O<sub>5</sub>) C, H, N.

**4-[[2,6-Dichloro-3-[N-methyl-N-(N-phthalimidoacetyl)amino]benzyl]oxy]-2-methylquinoxaline (67a).** Using a similar procedure to that used for **68a**, the title compound was obtained in 72.3% yield from **65a** and **34a** as colorless crystals after crystallization from MeOH: mp 218–219 °C; <sup>1</sup>H NMR (CDCl<sub>3</sub>) δ 2.78 (3H, s), 3.24 (3H, s), 4.10 (2H, s), 5.63 (1H, d, *J* = 10 Hz), 5.71 (1H, d, *J* = 10 Hz), 7.33 (1H, br d, *J* = 7.5 Hz), 7.50 (1H, d, *J* = 8 Hz), 7.54 (1H, d, *J* = 8 Hz), 7.63 (1H, t, *J* = 7.5 Hz), 7.69–7.78 (3H, m), 7.82–7.90 (2H, m), 8.73 (1H, s); MS (ESI) *m/z* 535 (*M* + 1). Anal. (C<sub>27</sub>H<sub>20</sub>Cl<sub>2</sub>N<sub>4</sub>O<sub>4</sub>) C, H, N.

**4-[[2,6-Dimethyl-3-[N-methyl-N-(N-phthalimidoacetyl)amino]benzyl]oxy]-2-methylquinoxaline (67b).** Using a similar procedure to that used for **68a**, the title compound was obtained in 72.3% yield from **65b** and **34a** as colorless crystals after crystallization from AcOEt: mp 124–127 °C; <sup>1</sup>H NMR (CDCl<sub>3</sub>) δ 2.50 (3H, s), 2.54 (3H, s), 2.76 (3H, s), 3.22 (3H, s), 3.96 (1H, d,

$J = 17$  Hz), 4.20 (1H, d,  $J = 17$  Hz), 5.37 (1H, d,  $J = 10$  Hz), 7.20–7.35 (3H, m), 7.61–7.77 (4H, m), 7.81–7.89 (2H, m), 8.74 (1H, s); MS (ESI)  $m/z$  495 ( $M + 1$ ).  
 Anal. ( $C_{29}H_{26}N_4O_4$ ) C, H, N.

**8-[[2,6-Dimethyl-3-[*N*-methyl-*N*-(*N*-phthalimidoacetyl)amino]benzyl]oxy]-2-methylquinoline (68b).** Using a similar procedure to that used for **68a**, the title compound was obtained in 63.9% yield from **65b** and 8-hydroxy-2-methylquinoline as colorless crystals after crystallization from MeOH: mp 117–119 °C;  $^1H$  NMR ( $CDCl_3$ )  $\delta$  2.51 (3H, s), 2.57 (3H, s), 2.73 (3H, s), 3.22 (3H, s), 3.96 (1H, d,  $J = 17$  Hz), 4.19 (1H, d,  $J = 17$  Hz), 5.38 (1H, d,  $J = 10$  Hz), 5.43 (1H, d,  $J = 10$  Hz), 7.17–7.32 (4H, m), 7.37–7.48 (2H, m), 7.67–7.74 (2H, m), 7.80–7.89 (2H, m), 8.02 (1H, d,  $J = 8$  Hz). Anal. ( $C_{30}H_{27}N_3O_4$ ) C, H, N.

**8-[[3-(*N*-Aminoacetyl-*N*-methylamino)-2,6-dichlorobenzyl]oxy]-2-methoxy-1-methyl-1*H*-benzimidazole (69).** Using a similar procedure to that used for **47a**, the title compound was obtained in 78.1% yield from **66** as a pale yellow amorphous solid:  $^1H$  NMR ( $CDCl_3$ )  $\delta$  3.00 (1H, d,  $J = 15$  Hz), 3.10 (1H, d,  $J = 15$  Hz), 3.21 (3H, s), 4.16 (3H, s), 5.62 (2H, s), 6.78–6.88 (2H, m), 7.09 (1H, t,  $J = 8$  Hz), 7.23 (1H, d,  $J = 8$  Hz), 7.43 (1H, d,  $J = 8$  Hz); MS (ESI)  $m/z$  423 ( $M + 1$ ). Anal. ( $C_{19}H_{20}Cl_2N_4O_3$ ) C, H, N.

**8-[[3-(*N*-Aminoacetyl-*N*-methylamino)-2,6-dichlorobenzyl]oxy]-2-methylquinoxaline (70a).** Using a similar procedure to that used for **47a**, the title compound was obtained in 91.2% yield from **67a** as a pale yellow amorphous solid:  $^1H$  NMR ( $CDCl_3$ )  $\delta$  2.79 (3H, s), 3.00 (1H, d,  $J = 17$  Hz), 3.11 (1H, d,  $J = 17$  Hz), 3.22 (3H, s), 5.62 (2H, s), 7.23–7.33 (2H, m), 7.49 (1H, d,  $J = 8$  Hz), 7.64 (1H, t,  $J = 7.5$  Hz), 7.78 (1H, br d,  $J = 7.5$  Hz), 8.75 (1H, s); MS (FAB)  $m/z$  405 ( $M + 1$ ). Anal. ( $C_{19}H_{18}Cl_2N_4O_2$ ) C, H, N.

**8-[[3-(*N*-Aminoacetyl-*N*-methylamino)-2,6-dimethylbenzyl]oxy]-2-methylquinoxaline (70b).** Using a similar procedure to that used for **47a**, the title compound was obtained in 93.3% yield from **67b** as a pale yellow amorphous solid:  $^1H$

NMR (CDCl<sub>3</sub>)  $\delta$  2.32 (3H, s), 2.51 (3H, s), 2.78 (3H, s), 2.68 (3H, s), 2.93 (1H, d,  $J$  = 17 Hz), 3.16 (1H, d,  $J$  = 17 Hz), 3.22 (3H, s), 5.34 (2H, s), 7.06 (1H, d,  $J$  = 8 Hz), 7.16 (1H, d,  $J$  = 8 Hz), 7.29 (1H, d,  $J$  = 8 Hz), 7.65 (1H, t,  $J$  = 8 Hz), 7.76 (1H, d,  $J$  = 8.0 Hz), 8.74 (1H, s); MS (FAB)  $m/z$  405 ( $M + 1$ ). Anal. (C<sub>19</sub>H<sub>18</sub>Cl<sub>2</sub>N<sub>4</sub>O<sub>2</sub>) C, H, N.

**8-[[3-(*N*-Aminoacetyl-*N*-methylamino)-2,6-dichlorobenzyl]oxy]-2-methylquinoline (71a).** Using a similar procedure to that used for **47a**, the title compound was obtained in 91.2% yield from **68a** as pale brown crystals after crystallization from diethyl ether: mp 145–149°C; <sup>1</sup>H NMR (CDCl<sub>3</sub>)  $\delta$  2.76 (3H, s), 2.96 (1H, d,  $J$  = 16 Hz), 3.10 (1H, d,  $J$  = 16 Hz), 3.21 (3H, s), 5.66 (2H, s), 7.20–7.50 (6H, m), 8.02 (1H, d,  $J$  = 8 Hz). Anal. (C<sub>20</sub>H<sub>19</sub>Cl<sub>2</sub>N<sub>3</sub>O<sub>2</sub>) C, H, N.

**8-[[3-(*N*-Aminoacetyl-*N*-methylamino)-2,6-dimethylbenzyl]oxy]-2-methylquinoxaline (71b).** Using a similar procedure to that used for **47a**, the title compound was obtained in 89.7% yield from **68b** as a pale yellow amorphous solid: <sup>1</sup>H NMR (CDCl<sub>3</sub>)  $\delta$  2.32 (3H, s), 2.51 (3H, s), 2.78 (3H, s), 2.68 (3H, s), 2.93 (1H, d,  $J$  = 17 Hz), 3.16 (1H, d,  $J$  = 17 Hz), 3.22 (3H, s), 5.34 (2H, s), 7.06 (1H, d,  $J$  = 8 Hz), 7.16 (1H, d,  $J$  = 8 Hz), 7.29 (1H, d,  $J$  = 8 Hz), 7.65 (1H, t,  $J$  = 8 Hz), 7.76 (1H, d,  $J$  = 8 Hz), 8.74 (1H, s); MS (FAB)  $m/z$  365 ( $M + 1$ ). Anal. (C<sub>21</sub>H<sub>24</sub>N<sub>4</sub>O<sub>2</sub>) C, H, N.

**4-[[2,6-Dichloro-3-[*N*-[(*E*)-4-(*N,N*-dimethylcarbamoyl)cinnamamidoacetyl]-*N*-methylamino]benzyl]oxy]-2-methoxy-1-methyl-1*H*-benzimidazole (72).** Following a procedure similar to method E, the title compound was obtained in 71.2% yield from **69a** and (*E*)-4-(*N,N*-dimethylcarbamoyl)cinnamic acid<sup>23</sup> as a colorless amorphous solid: <sup>1</sup>H NMR (CDCl<sub>3</sub>)  $\delta$  2.98 (3H, br s), 3.11 (3H, br s), 3.27 (3H, s), 3.53 (3H, s), 3.65 (1H, dd,  $J$  = 17, 5 Hz), 3.93 (1H, dd,  $J$  = 17, 5 Hz), 4.18 (3H, s), 5.63 (2H, s), 6.50 (1H, d,  $J$  = 15 Hz), 6.55 (1H, br t,  $J$  = 5 Hz), 6.80–6.87 (2H, m), 7.10 (1H, t,  $J$  = 8 Hz), 7.30 (1H, d,  $J$  = 8 Hz), 7.38–7.61 (6H, m); MS (ESI)  $m/z$  624 ( $M + 1$ ). Anal. (C<sub>31</sub>H<sub>31</sub>Cl<sub>2</sub>N<sub>5</sub>O<sub>5</sub>) C, H, N.

**4-[[3-[*N*-[(*E*)-3-(6-Acetamidopyridin-3-yl)acryloylglycyl]-*N*-methylamino]-2,6-dichlorobenzyl]oxy]-2-methoxy-1-methyl-1*H*-**

**benzimidazole (73a).** Following a procedure similar to method E, the title compound was obtained in 75.7% yield from **69a** and (*E*)-3-(6-acetamidopyridin-3-yl)acrylic acid<sup>23</sup> as a colorless amorphous solid: <sup>1</sup>H NMR (CDCl<sub>3</sub>) δ 2.21 (3H, s), 3.28 (3H, s), 3.53 (3H, s), 3.66 (1H, dd, *J* = 17, 4 Hz), 3.95 (1H, dd, *J* = 17, 5 Hz), 4.19 (3H, s), 5.66 (2H, s), 6.46 (1H, d, *J* = 15 Hz), 6.68 (1H, br t, *J* = 5 Hz), 6.80–6.88 (2H, m), 7.10 (1H, t, *J* = 8 Hz), 7.29 (1H, d, *J* = 8 Hz), 7.44–7.56 (2H, m), 7.83 (1H, dd, *J* = 17, 4 Hz), 8.07 (1H, br s), 8.20 (1H, d, *J* = 8 Hz), 8.35 (1H, br s); MS (ESI) *m/z* 611 (*M* + 1). Anal. (C<sub>29</sub>H<sub>28</sub>Cl<sub>2</sub>N<sub>6</sub>O<sub>5</sub>) C, H, N.

**4-[[3-[*N*-[(*E*)-3-(6-Acetamidopyridin-3-yl)acryloyl]glycyl]-*N*-methylamino]-2,6-dimethylbenzyl]oxy]-2-methoxy-1-methyl-1*H*-**

**benzimidazole (73b).** Following a procedure similar to method A the title compound was obtained in 63.7% yield from **21a** and **50c** as a colorless amorphous solid: <sup>1</sup>H NMR (CDCl<sub>3</sub>) δ 2.21 (3H, s), 2.33 (3H, s), 2.50 (3H, s), 3.26 (3H, s), 3.54 (3H, s), 3.62 (1H, dd, *J* = 17, 5 Hz), 3.88 (1H, dd, *J* = 17, 5 Hz), 4.19 (3H, s), 5.40 (2H, s), 6.47 (1H, d, *J* = 15 Hz), 6.72 (1H, br t, *J* = 5 Hz), 6.81–6.89 (2H, m), 7.03–7.18 (3H, m), 7.51 (1H, d, *J* = 15 Hz), 7.84 (1H, dd, *J* = 8, 2 Hz), 8.11 (1H, br s), 7.21 (1H, br d, *J* = 8 Hz), 8.36 (1H, br s); MS (ESI) *m/z* 571 (*M* + 1). Anal. (C<sub>31</sub>H<sub>34</sub>N<sub>6</sub>O<sub>5</sub>) C, H, N.

**8-[[2,6-Dichloro-3-[*N*-[(*E*)-4-(*N,N*-dimethylcarbamoyl)cinnamamidoacetyl]-*N*-methylamino]benzyl]oxy]-2-methylquinoxaline (74a).** Following a procedure similar to method E, the title

compound was obtained in 66.1% yield from **70a** and (*E*)-4-(*N,N*-dimethylcarbamoyl)cinnamic acid<sup>23</sup> as colorless crystals after crystallization from

isopropyl ether: mp 110–114 °C; <sup>1</sup>H NMR (CDCl<sub>3</sub>) δ 2.77 (3H, s), 2.98 (3H, br s), 3.11 (3H, br s), 3.27 (3H, s), 3.67 (1H, dd, *J* = 17, 4 Hz), 3.95 (1H, dd, *J* = 17, 5 Hz), 5.62 (2H, s), 6.51 (1H, d, *J* = 15 Hz), 6.68 (1H, br t, *J* = 5 Hz), 7.28–7.36 (2H, m), 7.42 (2H, d, *J* = 8 Hz), 7.48–7.70 (5H, m), 7.76 (1H, d, *J* = 8 Hz), 8.74 (1H, s). Anal. (C<sub>31</sub>H<sub>29</sub>Cl<sub>2</sub>N<sub>5</sub>O<sub>4</sub>) C, H, N.

**8-[[2,6-Dimethyl-3-[N-[(E)-4-(N,N-dimethylcarbamoyl)cinnamamidoacetyl]-N-methylamino]benzyl]oxy]-2-methylquinoxaline (74b).** Following a procedure similar to method E, the title compound was obtained in 66.1% yield from **70b** and (E)-4-(N,N-dimethylcarbamoyl)cinnamic acid<sup>23</sup> as a colorless amorphous solid: <sup>1</sup>H NMR (CDCl<sub>3</sub>) δ 2.31 (3H, s), 2.50 (3H, s), 2.73 (3H, s), 2.98 (3H, br s), 3.11 (3H, s), 3.26 (3H, s), 3.63 (1H, dd, *J* = 17, 4 Hz), 3.87 (1H, dd, *J* = 17, 5 Hz), 5.34 (2H, s), 6.50 (1H, d, *J* = 15 Hz), 6.68 (1H, br t, *J* = 5 Hz), 7.08 (1H, d, *J* = 8 Hz), 7.18 (1H, d, *J* = 8 Hz), 7.30 (1H, d, *J* = 8 Hz), 7.41 (2H, d, *J* = 8 Hz), 7.48–7.60 (5H, m), 7.65 (1H, t, *J* = 8 Hz), 7.75 (1H, d, *J* = 8 Hz), 8.73 (1H, s); MS (ESI) *m/z* 566 (*M* + 1). Anal. (C<sub>33</sub>H<sub>35</sub>N<sub>5</sub>O<sub>4</sub>) C, H, N.

**8-[[2,6-Dichloro-3-[N-methyl-N-[(E)-4-(2-oxo-pyrrolidin-1-yl)cinnamamidoacetyl]amino]benzyl]oxy]-2-methylquinoxaline (75a).** Following a procedure similar to method E, the title compound was obtained in 74.5% yield from **70a** and (E)-4-(2-oxo-pyrrolidin-1-yl)cinnamic acid<sup>23</sup> as a colorless amorphous solid: <sup>1</sup>H NMR (CDCl<sub>3</sub>) δ 2.12–2.25 (2H, m), 2.63 (2H, t, *J* = 7.5 Hz), 2.78 (3H, s), 3.28 (3H, s), 3.65 (1H, dd, *J* = 17, 4 Hz), 3.85–4.00 (3H, m), 5.62 (2H, s), 6.43 (1H, d, *J* = 15 Hz), 6.59 (1H, br t, *J* = 4 Hz), 7.29–7.38 (2H, m), 7.48–7.70 (7H, m), 7.78 (1H, d, *J* = 8 Hz), 8.73 (1H, s); MS (FAB) *m/z* 618 (*M* + 1). Anal. (C<sub>32</sub>H<sub>29</sub>Cl<sub>2</sub>N<sub>5</sub>O<sub>4</sub>) C, H, N.

**8-[[2,6-Dimethyl-3-[N-methyl-N-[(E)-4-(2-oxo-pyrrolidin-1-yl)cinnamamidoacetyl]amino]benzyl]oxy]-2-methylquinoxaline (75b).** Following a procedure similar to method E, the title compound was obtained in 92.7% yield from **70b** and (E)-4-(2-oxo-pyrrolidin-1-yl)cinnamic acid<sup>23</sup> as a colorless amorphous solid: <sup>1</sup>H NMR (CDCl<sub>3</sub>) δ 2.11–2.23 (2H, m), 2.34 (3H, s), 2.50 (3H, s), 2.62 (2H, t, *J* = 7.5 Hz), 2.77 (3H, s), 3.26 (3H, s), 3.64 (1H, dd, *J* = 17, 5 Hz), 3.81–3.91 (3H, m), 5.35 (2H, s), 6.42 (1H, d, *J* = 15 Hz), 6.64 (1H, br s), 7.10 (1H, d, *J* = 8 Hz), 7.19 (1H, d, *J* = 8 Hz), 7.30 (1H, d, *J* = 8 Hz), 7.48–7.57 (3H, m), 7.62–7.70

(3H, m), 7.75 (1H, d,  $J = 8$  Hz), 8.74 (1H, s); MS (FAB)  $m/z$  578 ( $M + 1$ ). Anal. ( $C_{34}H_{35}N_5O_4$ ) C, H, N.

**8-[[3-[*N*-[(*E*)-4-(Acetamido)cinnamidoacetyl]-*N*-methylamino]-2,6-dichlorobenzyl]oxy]-2-methylquinoxaline (77a).** Following a procedure similar to method E, the title compound was obtained in 84.7% yield from **70a** and (*E*)-4-(acetamido)cinnamic acid as a colorless amorphous solid:  $^1\text{H}$  NMR ( $\text{CDCl}_3$ )  $\delta$  2.15 (3H, s), 2.76 (3H, s), 3.26 (3H, s), 3.64 (1H, dd,  $J = 17, 4$  Hz), 3.92 (1H, dd,  $J = 17, 5$  Hz), 5.61 (2H, s), 6.39 (1H, d,  $J = 15$  Hz), 6.61 (1H, br t,  $J = 4$  Hz), 7.28–7.35 (2H, m), 7.40–7.58 (6H, m), 7.62–7.71 (2H, m), 7.78 (1H, d,  $J = 8$  Hz), 8.74 (1H, s); MS (FAB)  $m/z$  592 ( $M + 1$ ). Anal. ( $C_{30}H_{27}Cl_2N_5O_4$ ) C, H, N.

**8-[[3-[*N*-[(*E*)-4-(Acetamido)cinnamidoacetyl]-*N*-methylamino]-2,6-dichlorobenzyl]oxy]-2-methylquinoxaline Hydrochloride (76a).** Following a procedure similar to method B, the title compound was obtained in 89.5% yield from **77a** as a colorless amorphous solid:  $^1\text{H}$  NMR ( $\text{CDCl}_3\text{--CD}_3\text{OD}$ )  $\delta$  2.17 (3H, s), 2.91 (3H, s), 3.29 (3H, s), 3.69 (1H, d,  $J = 17$  Hz), 3.98 (1H, d,  $J = 17$  Hz), 5.62 (2H, s), 6.43 (1H, d,  $J = 15$  Hz), 7.40–7.59 (8H, m), 7.87 (1H, br t,  $J = 8$  Hz), 7.95 (1H, br d,  $J = 8$  Hz), 8.90 (1H, s). Anal. ( $C_{30}H_{27}Cl_2N_5O_4 \cdot \text{HCl}$ ) C, H, N.

**8-[[3-[*N*-[(*E*)-3-(6-Acetylaminopyridine-3-yl)acryloylglycyl]-*N*-methylamino]-2,6-dimethylbenzyl]oxy]-2-methylquinoxaline (77b).** Following a procedure similar to method E, the title compound was obtained in 84.7% yield from **70b** and (*E*)-3-(6-acetamidopyridin-3-yl)acrylic acid<sup>23</sup> as a colorless amorphous solid:  $^1\text{H}$  NMR ( $\text{CDCl}_3$ )  $\delta$  2.22 (3H, s), 2.35 (3H, s), 2.51 (3H, s), 2.77 (3H, s), 3.27 (3H, s), 3.64 (1H, dd,  $J = 17, 5$  Hz), 3.87 (1H, dd,  $J = 17, 5$  Hz), 5.35 (2H, s), 6.47 (1H, d,  $J = 15$  Hz), 6.71 (1H, br t,  $J = 5$  Hz), 7.10 (1H, d,  $J = 8$  Hz), 7.19 (1H, d,  $J = 8$  Hz), 7.31 (1H, d,  $J = 8$  Hz), 7.51 (1H, d,  $J = 15$  Hz), 7.67 (1H, t,  $J = 8$  Hz), 7.76 (1H, d,  $J = 8$  Hz), 7.85 (1H, d,  $J = 8$  Hz), 8.07 (1H, br s), 7.21 (1H, br d,  $J = 8$  Hz), 8.36 (1H, br s), 8.74 (1H, s); MS (ESI)  $m/z$  553 ( $M + 1$ ). Anal. ( $C_{31}H_{32}N_6O_4$ ) C, H, N.

**8-[[2,6-Dimethyl-3-[N-[(E)-3-(6-ethoxycarbonylpyridin-3-yl)acryloylglycyl]-N-methylamino]benzyl]oxy]-2-methylquinolxaine (78).**

Following a procedure similar to method E, the title compound was obtained in 81.5% yield from **70b** and (E)-3-(6-ethoxycarbonylpyridin-3-yl)acrylic acid<sup>23</sup> as a colorless amorphous solid: <sup>1</sup>H NMR (CDCl<sub>3</sub>) δ 1.45 (3H, t, *J* = 7.5 Hz), 2.33 (3H, s), 2.51 (3H, s), 2.77 (3H, s), 3.27 (3H, s), 3.64 (1H, dd, *J* = 17, 5 Hz), 3.89 (1H, dd, *J* = 17, 4 Hz), 4.49 (2H, q, *J* = 7.5 Hz), 5.35 (2H, s), 6.63 (1H, d, *J* = 15 Hz), 6.78 (1H, br t, *J* = 5 Hz), 7.10 (1H, d, *J* = 8 Hz), 7.20 (1H, d, *J* = 8 Hz), 7.31 (1H, d, *J* = 8 Hz), 7.60 (1H, d, *J* = 15 Hz), 7.67 (1H, t, *J* = 8 Hz), 7.76 (1H, d, *J* = 8 Hz), 7.92 (1H, dd, *J* = 8, 3 Hz), 8.14 (1H, d, *J* = 8 Hz), 8.74 (1H, br s), 8.85 (1H, d, *J* = 3 Hz); MS (ESI) *m/z* 568 (*M* + 1). Anal. (C<sub>32</sub>H<sub>33</sub>N<sub>5</sub>O<sub>5</sub>) C, H, N.

**8-[[3-[N-[(E)-3-(6-Carboxypyridin-3-yl)acryloylglycyl]-N-methylamino]-2,6-dimethylbenzyl]oxy]-2-methylquinoxaline (79).** Using a similar procedure to that used for **83a**, the title compound was obtained in 90.3% yield from **78** as a pale yellow amorphous solid: <sup>1</sup>H NMR (CDCl<sub>3</sub>) δ 2.36 (3H, s), 2.51 (3H, s), 2.78 (3H, s), 3.28 (3H, s), 3.66 (1H, dd, *J* = 17, 5 Hz), 3.90 (1H, dd, *J* = 17, 5 Hz), 5.35 (2H, s), 6.68 (1H, d, *J* = 15 Hz), 6.83 (1H, br t, *J* = 5 Hz), 7.10 (1H, d, *J* = 8 Hz), 7.20 (1H, d, *J* = 8 Hz), 7.31 (1H, d, *J* = 8 Hz), 7.58–7.70 (2H, m), 7.77 (1H, d, *J* = 8 Hz), 8.02 (1H, dd, *J* = 8, 2 Hz), 8.21 (1H, d, *J* = 8 Hz), 8.70 (1H, br d, *J* = 2 Hz), 8.75 (1H, s); MS (ESI) *m/z* 540 (*M* + 1). Anal. (C<sub>30</sub>H<sub>29</sub>N<sub>5</sub>O<sub>5</sub>) C, H, N.

**8-[[2,6-Dichloro-3-[N-methyl-N-[(E)-3-(3-pyridinyl)acryloylglycyl]amino]benzyl]oxy]-2-methylquinoline (80b).**

Following a procedure similar to method E, the title compound was obtained in 87.8% yield from **71a** and (E)-3-(3-pyridyl)acrylic acid as a colorless amorphous solid: <sup>1</sup>H NMR (CDCl<sub>3</sub>) δ 2.72 (3H, s), 3.27 (3H, s), 3.67 (1H, dd, *J* = 17, 4 Hz), 3.95 (1H, dd, *J* = 17, 5 Hz), 5.65 (2H, s), 6.57 (1H, d, *J* = 15 Hz), 6.77 (1H, br t, *J* = 4 Hz), 7.21–7.64 (8H, m), 7.80 (1H, dt, *J* = 8, 1 Hz), 8.03 (1H, d, *J* = 8 Hz), 8.57 (1H, dd, *J* = 5, 1 Hz), 8.72 (1H, d, *J* = 1 Hz). Anal. (C<sub>28</sub>H<sub>24</sub>Cl<sub>2</sub>N<sub>4</sub>O<sub>3</sub>) C, H, N.

**8-[[3-[*N*-[(*E*)-Cinnamamidoacetyl]-*N*-methylamino]-2,6-dichlorobenzyl]oxy]-2-methylquinoline Hydrochloride (81a).** Following a procedure similar to method B, the title compound was obtained in 92.1% yield from **80a** as a pale yellow amorphous solid:  $^1\text{H}$  NMR ( $\text{CDCl}_3\text{-CD}_3\text{OD}$ )  $\delta$  3.09 (3H, s), 3.21 (3H, s), 3.91 (2H, s), 5.59 (1H, d,  $J = 10$  Hz), 5.79 (1H, d,  $J = 10$  Hz), 6.59 (1H, d,  $J = 16$  Hz), 7.28–7.69 (8H, m), 7.72 (1H, br d,  $J = 8$  Hz), 7.81–8.03 (3H, m), 8.98 (1H, d,  $J = 8$  Hz). Anal. ( $\text{C}_{29}\text{H}_{25}\text{Cl}_2\text{N}_3\text{O}_3\cdot\text{HCl}$ ) C, H, N.

**8-[[2,6-Dichloro-3-[*N*-methyl-*N*-[(*E*)-3-(3-pyridinyl)acryloylglycyl]amino]benzyl]oxy]-2-methylquinoline Dihydrochloride (81b).** Following a procedure similar to method B, the title compound was obtained in 89.2% yield from **80b** and (*E*)-3-(3-pyridyl)acrylic acid as a colorless amorphous solid:  $^1\text{H}$  NMR ( $\text{CDCl}_3\text{-CD}_3\text{OD}$ )  $\delta$  2.90 (3H, s), 3.15 (3H, s), 3.60 (1H, dd,  $J = 16, 5$  Hz), 3.92 (1H, dd,  $J = 16, 5$  Hz), 5.64 (2H, s), 7.08 (1H, d,  $J = 15$  Hz), 7.53 (1H, d,  $J = 15$  Hz), 7.77–8.00 (7H, m), 8.43–8.59 (2H, m), 8.77 (1H, d,  $J = 8$  Hz), 8.90–9.08 (2H, m). Anal. ( $\text{C}_{28}\text{H}_{24}\text{Cl}_2\text{N}_4\text{O}_3\cdot\text{HCl}$ ) C, H, N.

**8-[[2,6-Dichloro-3-[*N*-[(*E*)-4-(methoxycarbonyl)cinnamamidoacetyl]-*N*-methylamino]benzyl]oxy]-2-methylquinoline (82a).** Following a procedure similar to method E, the title compound was obtained in 92.3% yield from **71a** and (*E*)-4-(methoxycarbonyl)cinnamic acid as a colorless amorphous solid:  $^1\text{H}$  NMR ( $\text{CDCl}_3$ )  $\delta$  2.74 (3H, s), 3.27 (3H, s), 3.64 (1H, dd,  $J = 17, 4$  Hz), 3.87–4.00 (4H, m), 5.60–5.70 (2H, m), 6.57 (1H, d,  $J = 15$  Hz), 6.75 (1H, br t,  $J = 5$  Hz), 7.24–7.63 (11H, m), 8.03 (1H, m). Anal. ( $\text{C}_{31}\text{H}_{27}\text{Cl}_2\text{N}_3\text{O}_5$ ) C, H, N.

**8-[[2,6-Dichloro-3-[*N*-[(*E*)-3-(6-ethoxycarbonylpyridin-3-yl)acryloylglycyl]-*N*-methylamino]benzyl]oxy]-2-methylquinoline (82b).** Following a procedure similar to method E, the title compound was obtained in 83.5% yield from **71a** and (*E*)-3-(6-ethoxycarbonylpyridin-3-yl)acrylic acid<sup>23</sup> as a colorless amorphous solid:  $^1\text{H}$  NMR ( $\text{CDCl}_3$ )  $\delta$  1.45 (3H, t,  $J = 7.5$  Hz), 2.72 (3H, s), 3.27 (3H, s), 3.70 (1H, dd,  $J = 17, 5$  Hz), 3.94 (1H, dd,  $J = 17, 5$  Hz), 4.49 (2H, q,  $J = 7.5$  Hz),

5.59–5.70 (2H, m), 6.66 (1H, d,  $J = 15$  Hz), 6.80 (1H, br t,  $J = 5$  Hz), 7.22–7.35 (3H, m), 7.37–7.53 (3H, m), 7.60 (1H, d,  $J = 15$  Hz), 7.91 (1H, m), 8.02 (1H, d,  $J = 8$  Hz), 8.12 (1H, d,  $J = 8$  Hz), 8.84 (1H, m). Anal. ( $C_{31}H_{28}Cl_2N_4O_5$ ) C, H, N.

**8-[[2,6-Dimethyl-3-[*N*-[(*E*)-3-(6-ethoxycarbonylpyridin-3-yl)acryloylglycyl]-*N*-methylamino]benzyl]oxy]-2-methylquinoline (82c).**

Following a procedure similar to method E, the title compound was obtained in 88.2% yield from **71b** and (*E*)-3-(6-ethoxycarbonylpyridin-3-yl)acrylic acid<sup>23</sup> as a colorless amorphous solid:  $^1\text{H}$  NMR ( $\text{CDCl}_3$ )  $\delta$  1.45 (3H, t,  $J = 7.5$  Hz), 2.38 (3H, s), 2.53 (3H, s), 2.72 (3H, s), 3.26 (3H, s), 3.64 (1H, dd,  $J = 18, 4$  Hz), 3.90 (1H, dd,  $J = 18, 4$  Hz), 4.49 (2H, q,  $J = 7.5$  Hz), 5.36 (2H, s), 6.64 (1H, d,  $J = 16$  Hz), 6.78 (1H, br t,  $J = 5$  Hz), 7.08 (1H, d,  $J = 8$  Hz), 7.18 (1H, d,  $J = 8$  Hz), 7.23–7.33 (2H, m), 7.39–7.49 (2H, m), 7.61 (1H, d,  $J = 16$  Hz), 7.92 (1H, dd,  $J = 8, 2$  Hz), 8.03 (1H, d,  $J = 8$  Hz), 8.13 (1H, d,  $J = 8$  Hz), 8.84 (1H, d,  $J = 2$  Hz); MS (ESI)  $m/z$  567 ( $M + 1$ ). Anal. ( $C_{33}H_{34}N_4O_5$ ) C, H, N.

**8-[[2,6-Dichloro-3-[*N*-[(*E*)-3-(methoxycarbonyl)cinnamamidoacetyl]-*N*-methylamino]benzyl]oxy]-2-methylquinoline (82d).**

Following a procedure similar to method E, the title compound was obtained in 83.1% yield from **71a** and (*E*)-3-(methoxycarbonyl)cinnamic acid as a colorless amorphous solid:  $^1\text{H}$  NMR ( $\text{CDCl}_3$ )  $\delta$  2.72 (3H, s), 3.27 (3H, s), 3.65 (1H, dd,  $J = 17, 4$  Hz), 3.85–4.01 (4H, m), 5.65 (2H, s), 6.55 (1H, d,  $J = 15$  Hz), 6.68 (1H, br t,  $J = 5$  Hz), 7.20–7.36 (3H, m), 7.36–7.54 (4H, m), 7.54–7.70 (2H, m), 7.95–8.06 (2H, m), 8.20 (1H, br s). Anal. ( $C_{31}H_{27}Cl_2N_3O_5$ ) C, H, N.

**8-[[3-[*N*-[(*E*)-3-(6-Carboxypyridin-3-yl)acryloylglycyl]-*N*-methylamino]-2,6-dichlorobenzyl]oxy]-2-methylquinoline (83b).**

Using a similar procedure to that used for **83a**, the title compound was obtained in 86.6% yield from **82b** as a colorless amorphous solid:  $^1\text{H}$  NMR ( $\text{DMSO}-d_6$ )  $\delta$  2.58 (3H, s), 3.13 (3H, s), 3.50 (1H, dd,  $J = 17, 5$  Hz), 3.80 (1H, dd,  $J = 17, 5$  Hz), 5.46 (1H, d,  $J = 10$

Hz), 5.53 (1H, d,  $J = 10$  Hz), 6.95 (1H, d,  $J = 15$  Hz), 7.30–7.57 (5H, m), 7.78 (2H, br s), 8.02 (1H, d,  $J = 8$  Hz), 8.10 (1H, d,  $J = 8$  Hz), 8.20 (1H, d,  $J = 8$  Hz), 8.45 (1H, br t,  $J = 5$  Hz), 8.85 (1H, s). Anal. ( $C_{29}H_{24}Cl_2N_4O_5$ ) C, H, N.

**8-[[3-[N-[(E)-3-(6-Carboxypyridin-3-yl)acryloylglycyl]-N-methylamino]-2,6-dimethylbenzyl]oxy]-2-methylquinoline (83c).** Using a similar procedure to that used for **83a**, the title compound was obtained in 80.4% yield from **82c** as a colorless amorphous solid:  $^1H$  NMR ( $DMSO-d_6$ )  $\delta$  2.33 (3H, s), 2.46 (3H, s), 2.61 (3H, s), 3.13 (3H, s), 3.51 (1H, dd,  $J = 17, 5$  Hz), 3.71 (1H, dd,  $J = 17, 5$  Hz), 5.25–5.37 (2H, m), 7.00 (1H, d,  $J = 15$  Hz), 7.25 (1H, d,  $J = 8$  Hz), 7.37 (1H, d,  $J = 8$  Hz), 7.37–7.57 (5H, m), 8.00 (1H, d,  $J = 8$  Hz), 8.08 (1H, d,  $J = 8$  Hz), 8.21 (1H, d,  $J = 8$  Hz), 8.33 (1H, br t,  $J = 5$  Hz), 8.78 (1H, br s); MS (ESI)  $m/z$  539 ( $M + 1$ ). Anal. ( $C_{31}H_{30}N_4O_5$ ) C, H, N.

**8-[[3-[N-[(E)-3-Carboxycinnamamidoacetyl-N-methylamino]-2,6-dichlorobenzyl]oxy]-2-methylquinoline (83d).** Using a similar procedure to that used for **83a**, the title compound was obtained in 84.6% yield from **82d** as colorless crystals after crystallization from MeCN: mp 162–164 °C;  $^1H$  NMR ( $DMSO-d_6$ )  $\delta$  2.70 (3H, s), 3.26 (3H, s), 3.65 (1H, d,  $J = 16$  Hz), 4.00 (1H, d,  $J = 16$  Hz), 5.58 (2H, s), 6.60 (1H, d,  $J = 16$  Hz), 7.20–7.68 (9H, m), 8.00 (1H, d,  $J = 7.5$  Hz), 8.06 (1H, d,  $J = 8$  Hz), 8.20 (1H, br s); MS (FAB)  $m/z$  578 ( $M + 1$ ). Anal. ( $C_{30}H_{25}Cl_2N_3O_5$ ) C, H, N.

**8-[[2,6-Dichloro-3-[N-methyl-N-[(E)-3-(N-methylcarbamoyl)cinnamamidoacetyl]amino]benzyl]oxy]-2-methylquinoline (84).** Following a procedure similar to method C, the title compound was obtained in 74.8% yield from **83d** and methylamine hydrochloride as a colorless amorphous solid:  $^1H$  NMR ( $CDCl_3$ )  $\delta$  2.70 (3H, s), 2.99 (3H, br s), 3.25 (3H, s), 3.66 (3H, br dd,  $J = 16, 4$  Hz), 3.95 (3H, br dd,  $J = 16, 4$  Hz), 5.65 (2H, s), 6.45–6.60 (2H, m), 6.50 (1H, m), 7.21–7.69 (9H, m), 7.75 (1H, d,  $J = 8$  Hz), 7.87 (1H, br s), 8.04 (1H, d,  $J = 8$  Hz). Anal. ( $C_{31}H_{28}Cl_2N_4O_4$ ) C, H, N.
